# Supplementary material for: Chemoselective Preparation of New Families of Phenolic-Organoselenium Hybrids—A Biological Assessment
Source: MDPI journal article supplement (doi:10.3390/molecules27041315), 2022-02-15
Supplement: s1 [file s1]

# Chemoselective Preparation of New Families of Phenolic-Organoselenium Hybrids—A Biological Assessment

Paloma Begines <sup>1</sup>, Sergio Martos <sup>1</sup>, Irene Lagunes <sup>2</sup>, Inés Maya <sup>1</sup>, José M. Padrón <sup>2,\*</sup>, Óscar López <sup>1,\*</sup> and José G. Fernández-Bolaños <sup>1,\*</sup>

<sup>1</sup>Departamento de Química Orgánica, Facultad de Química, Universidad de Sevilla, Apartado 1203, E-41071 Seville, Spain.; pbegines@us.es (P.B.), smardel251@iespinorueda.com (S.M.), imaya@us.es (I.M.)

<sup>2</sup>BioLab, Instituto Universitario de Bio-Orgánica “Antonio González” (IUBO-AG), Universidad de La Laguna, c/ Astrofísico Francisco Sánchez 2, E-38206 La Laguna, Spain; roslagunes@uv.mx

\* Correspondence: jmpadron@ull.es (J.M.P.), osc-lopez@us.es (O.L.), bolanos@us.es (J.G.F.-B.)

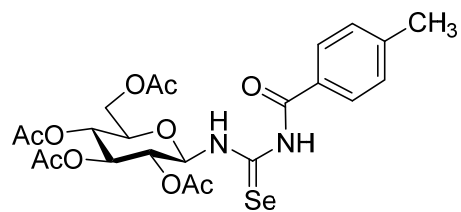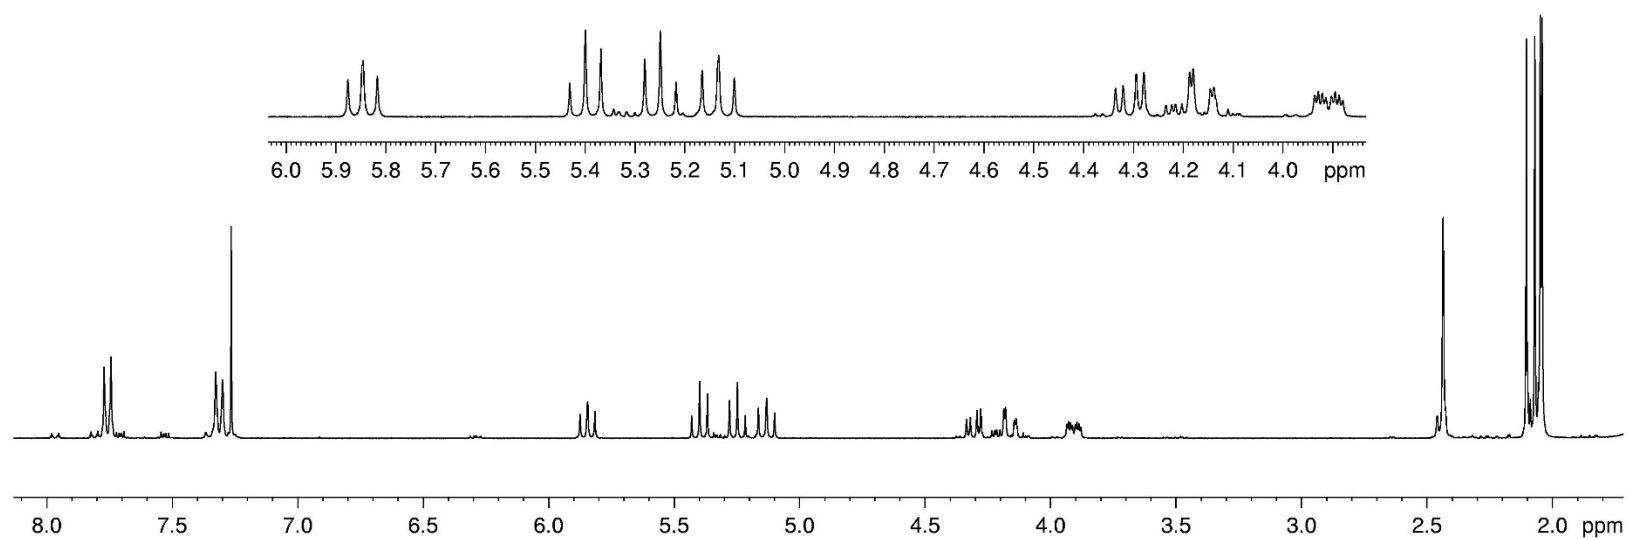

$^1\text{H}$ -NMR (300 MHz,  $\text{CDCl}_3$ ) of **3**

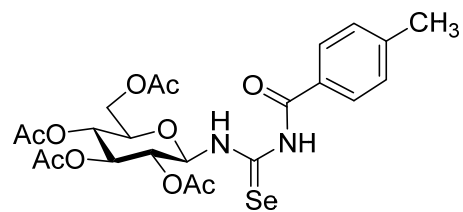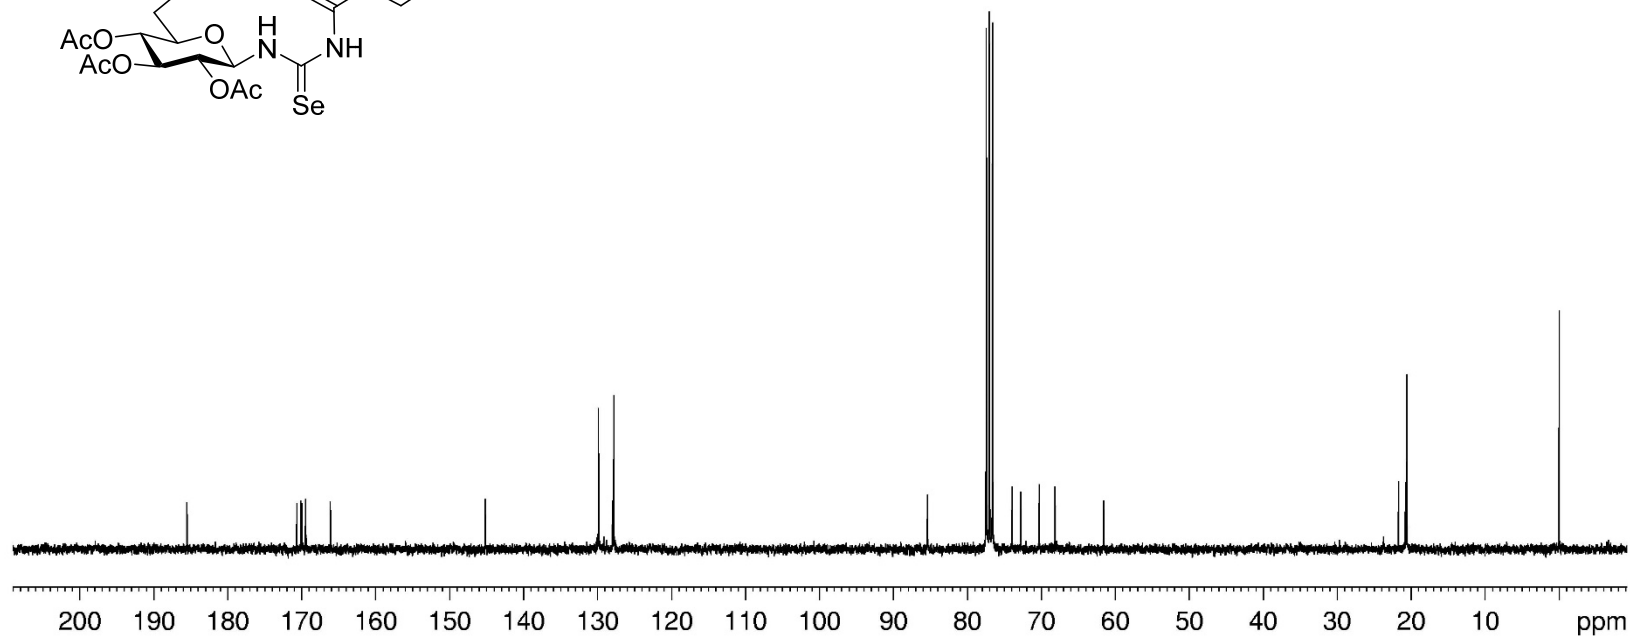

$^{13}\text{C}$ -NMR (75.5 MHz,  $\text{CDCl}_3$ ) of **3**

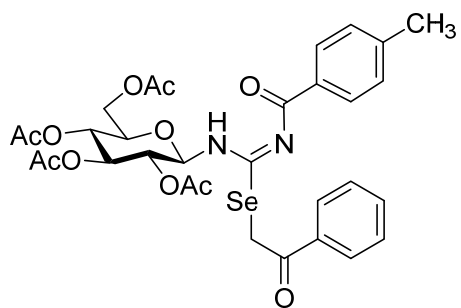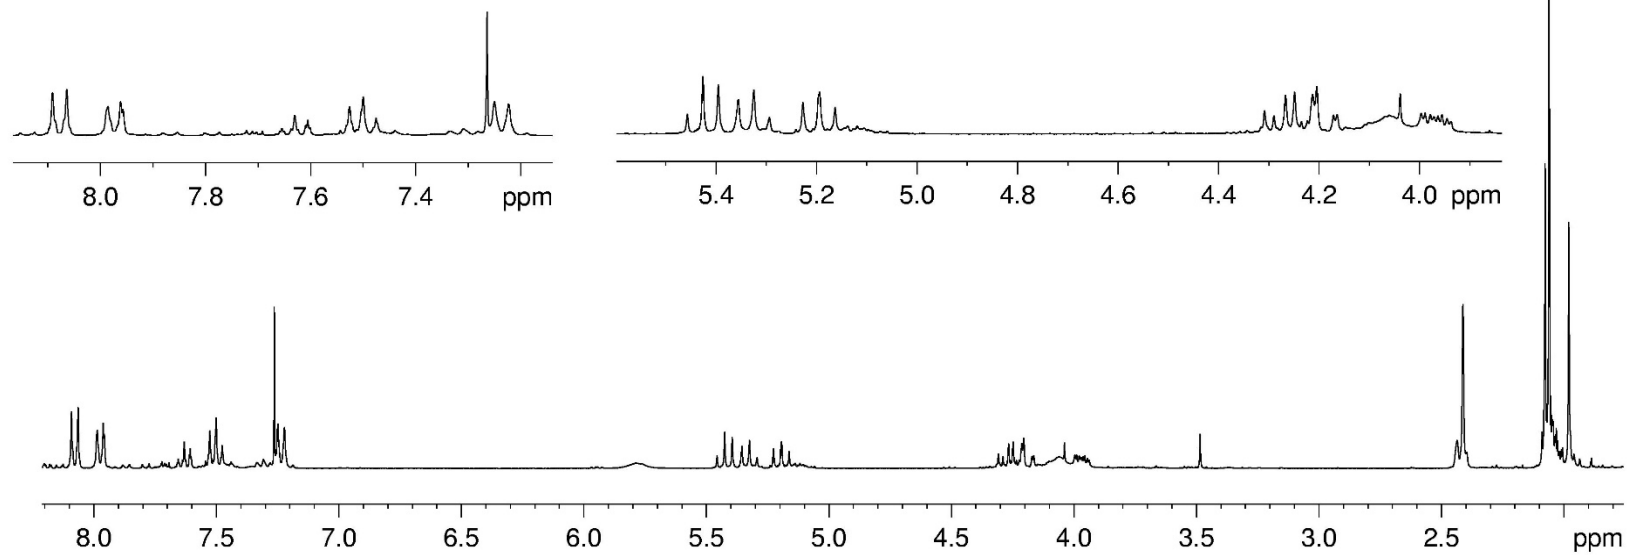

$^1\text{H}$ -NMR (300 MHz,  $\text{CDCl}_3$ ) of **7**

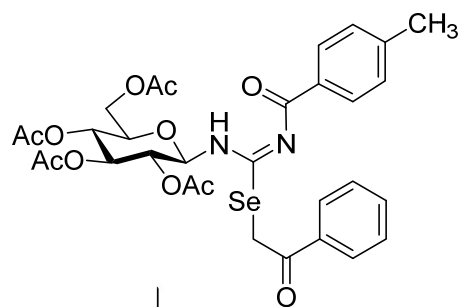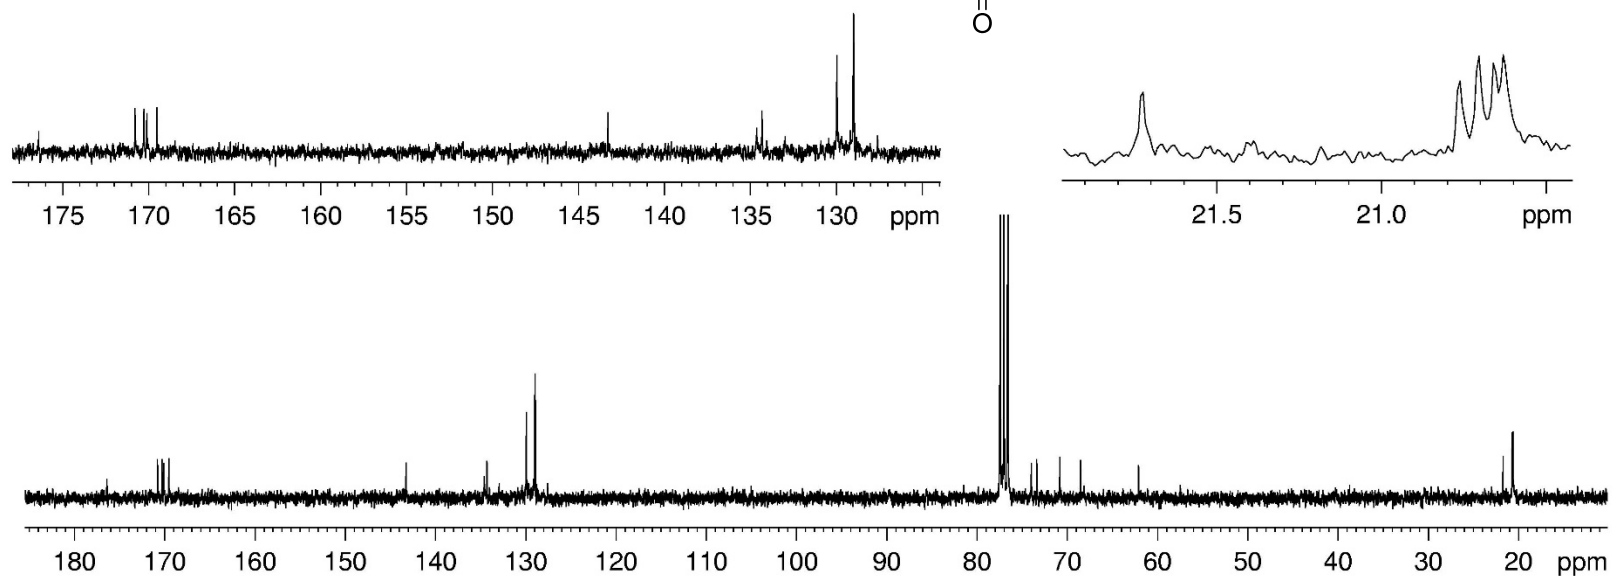

$^{13}\text{C}$ -NMR (75.5 MHz,  $\text{CDCl}_3$ ) of 7

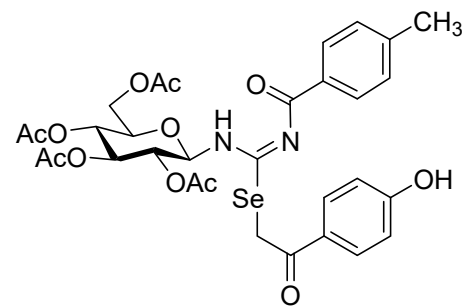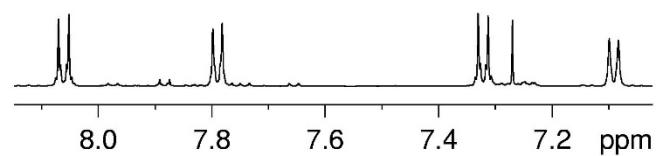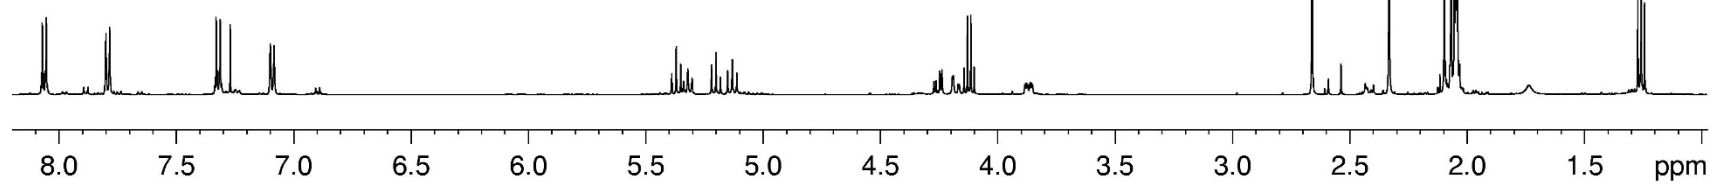

$^1\text{H}$ -NMR (500 MHz,  $\text{CDCl}_3$ ) of **8**

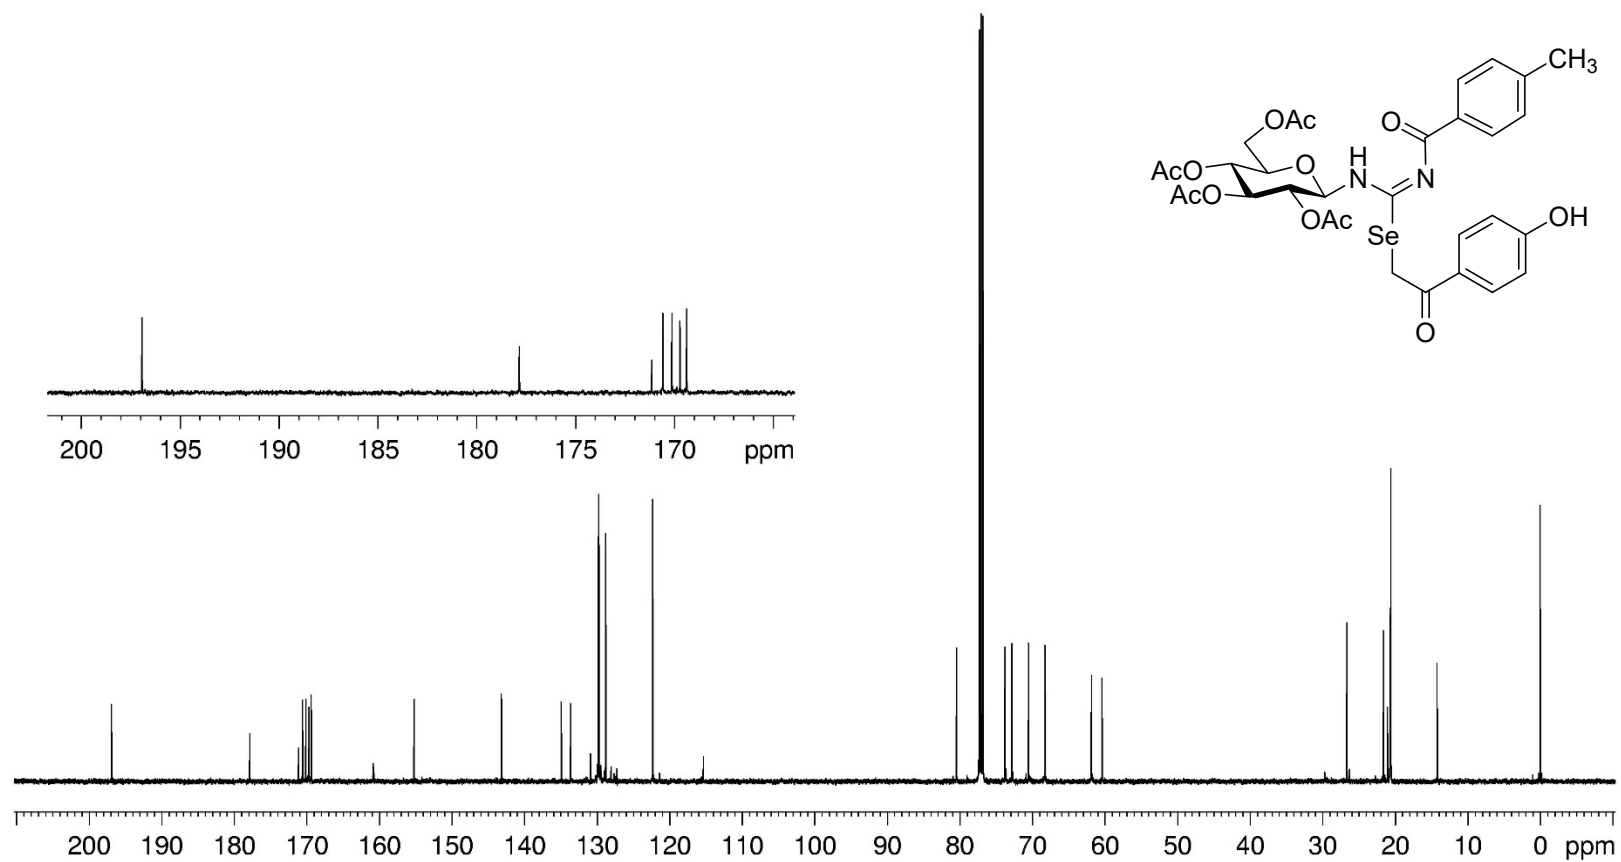

$^{13}\text{C}$ -NMR (125.7 MHz,  $\text{CDCl}_3$ ) of **8**

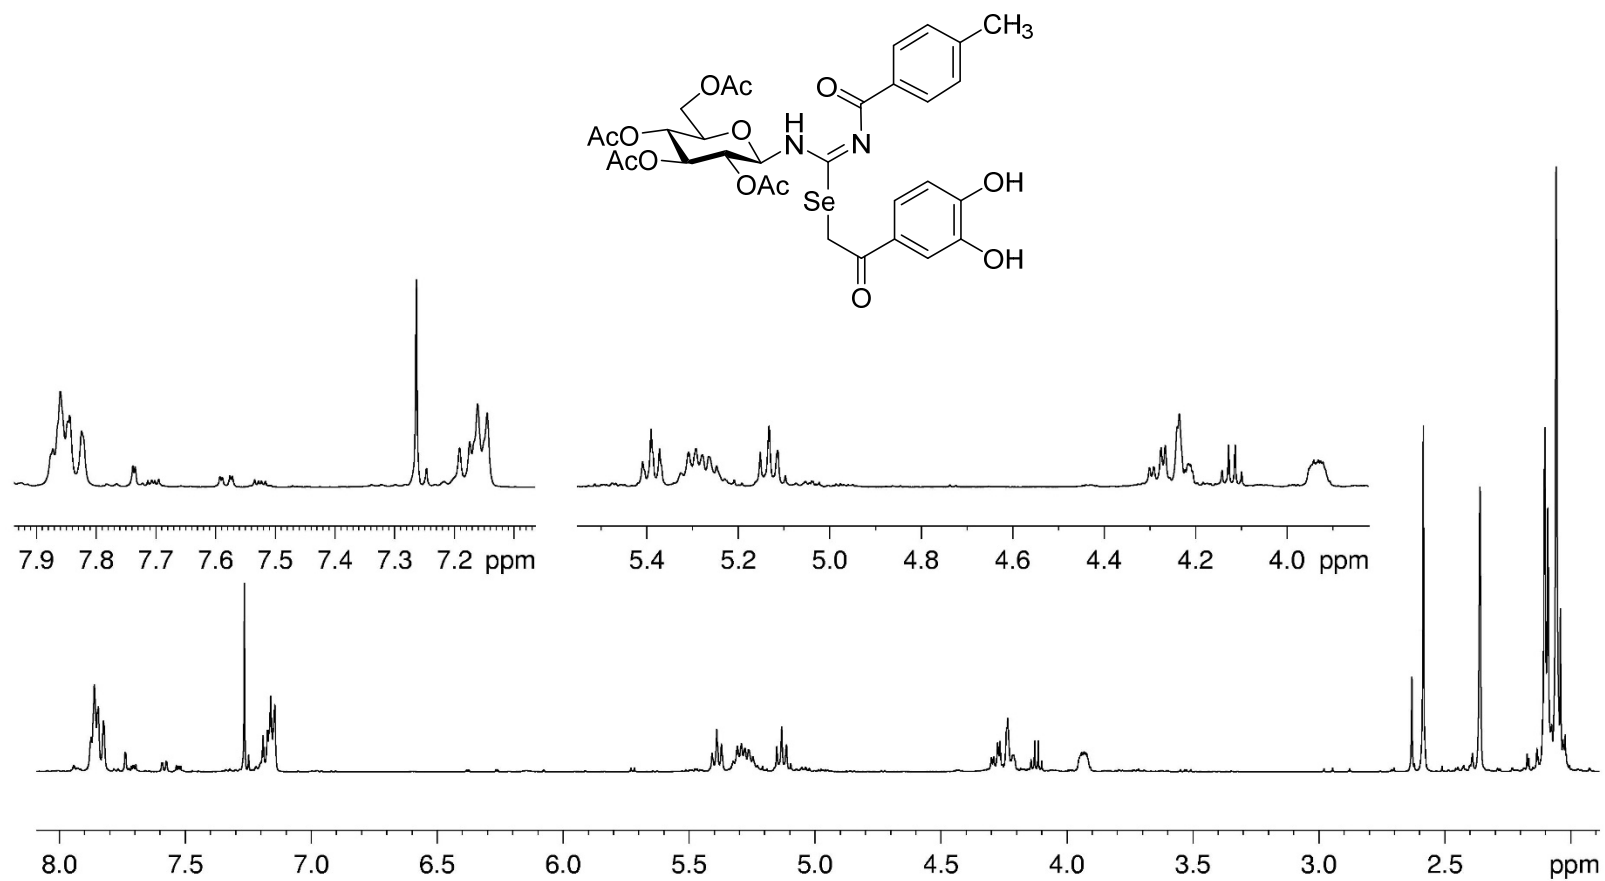

$^1\text{H-NMR}$  (500 MHz,  $\text{CDCl}_3$ ) of **9**



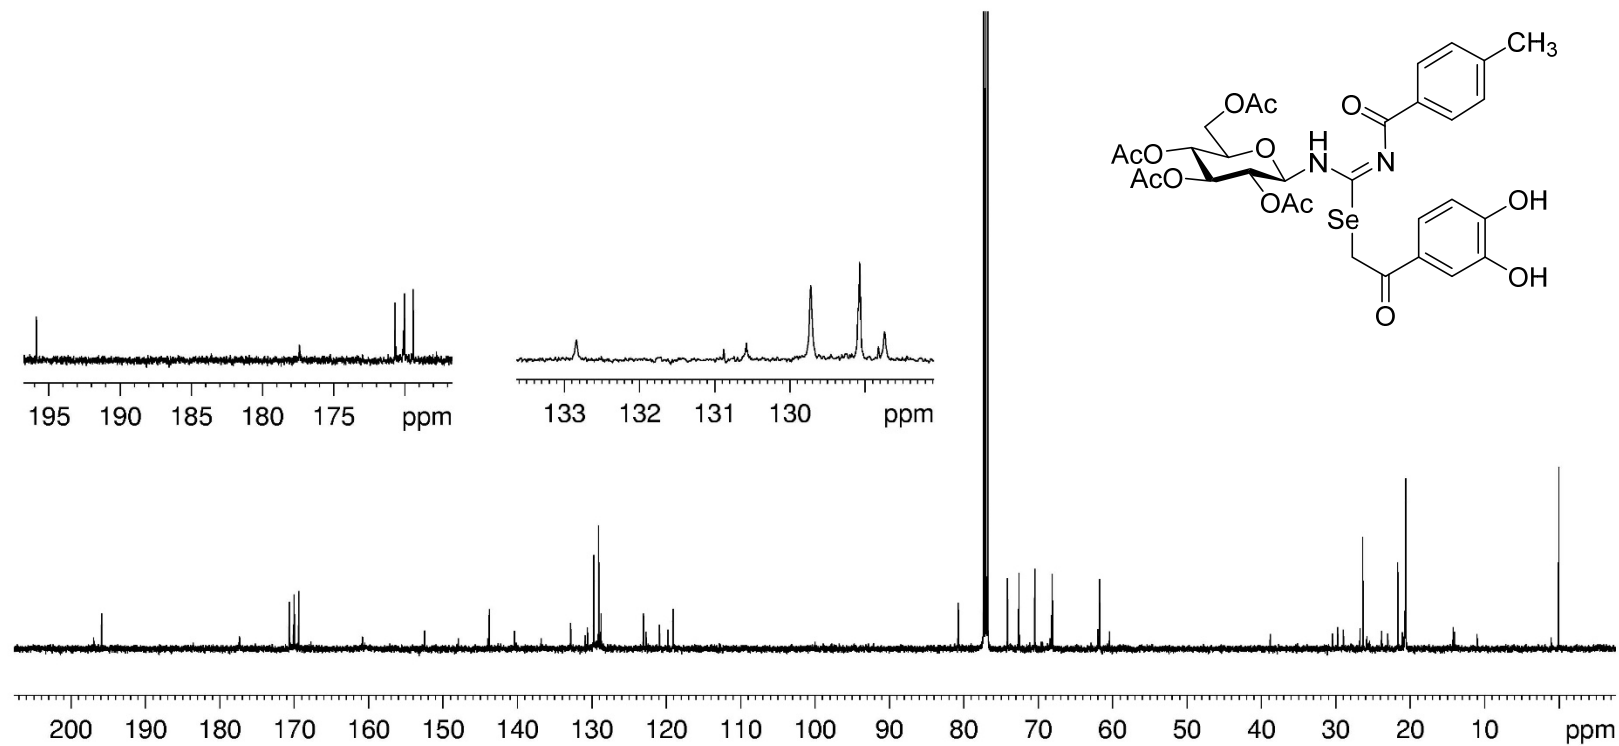

$^{13}\text{C}$ -NMR (125.7 MHz,  $\text{CDCl}_3$ ) of **9**

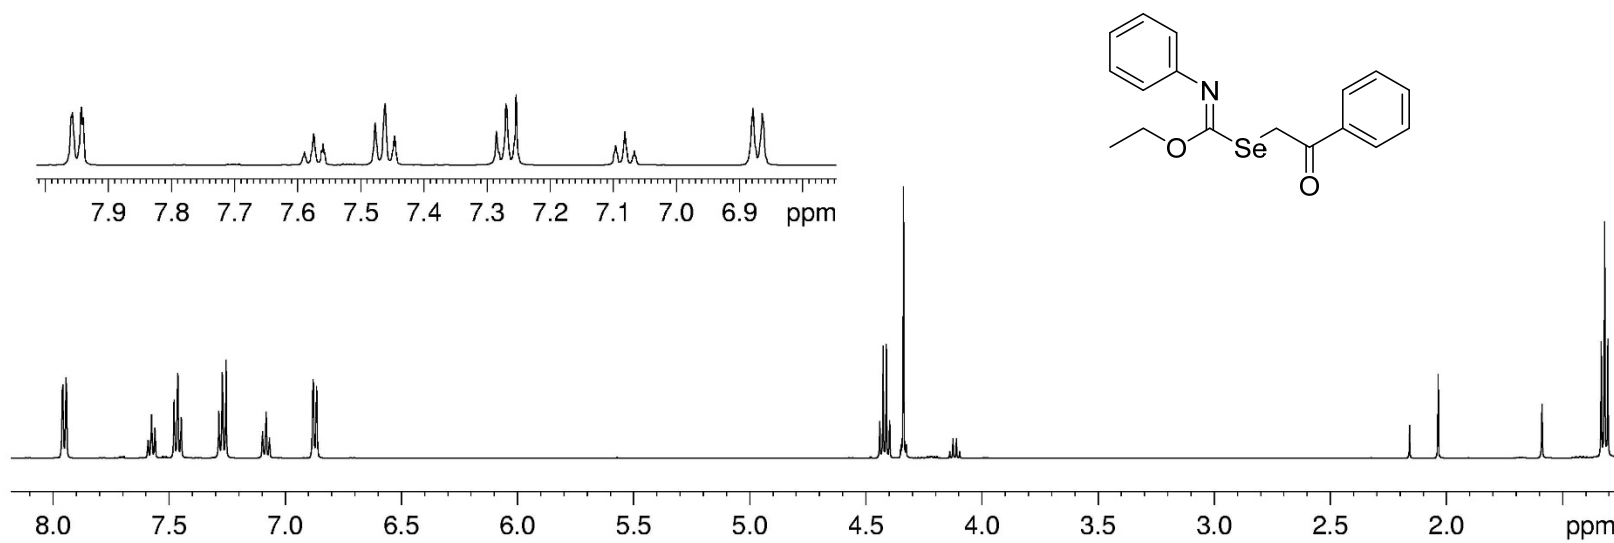

$^1\text{H}$ -NMR (500 MHz,  $\text{CDCl}_3$ ) of **16**

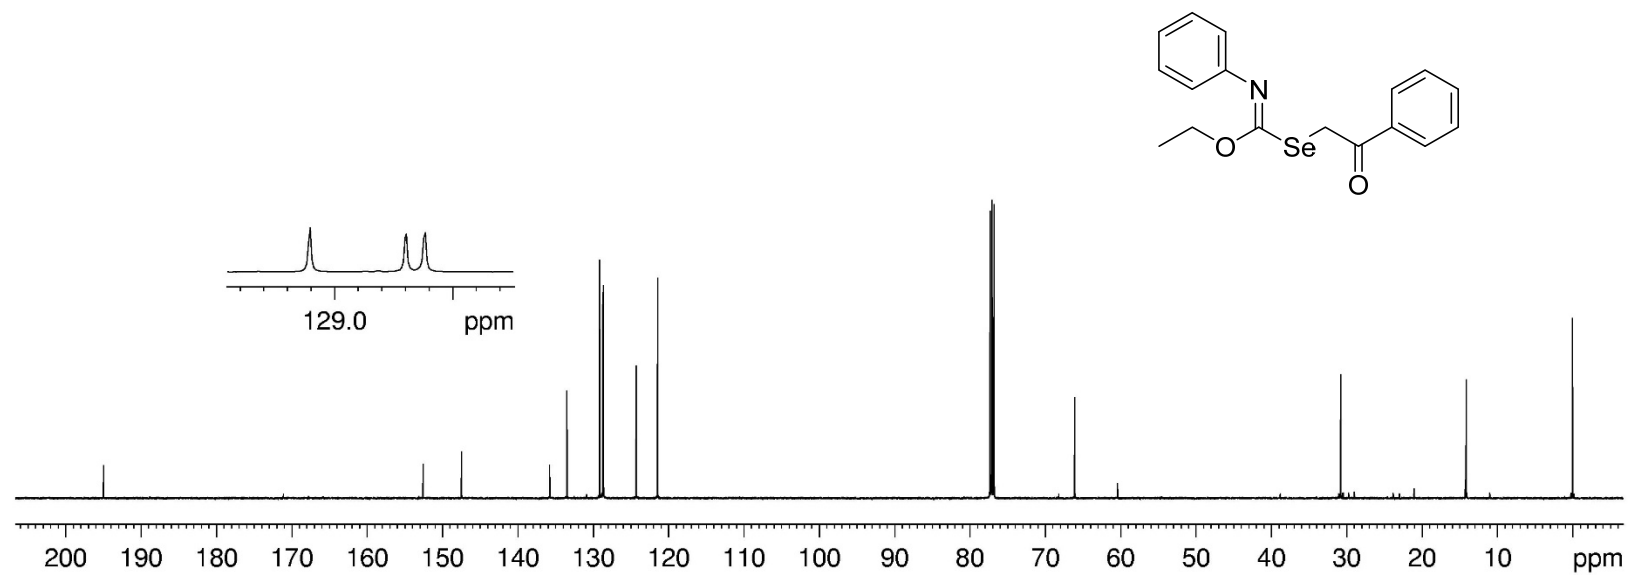

$^{13}\text{C}$ -NMR (125.7 MHz,  $\text{CDCl}_3$ ) of **16**

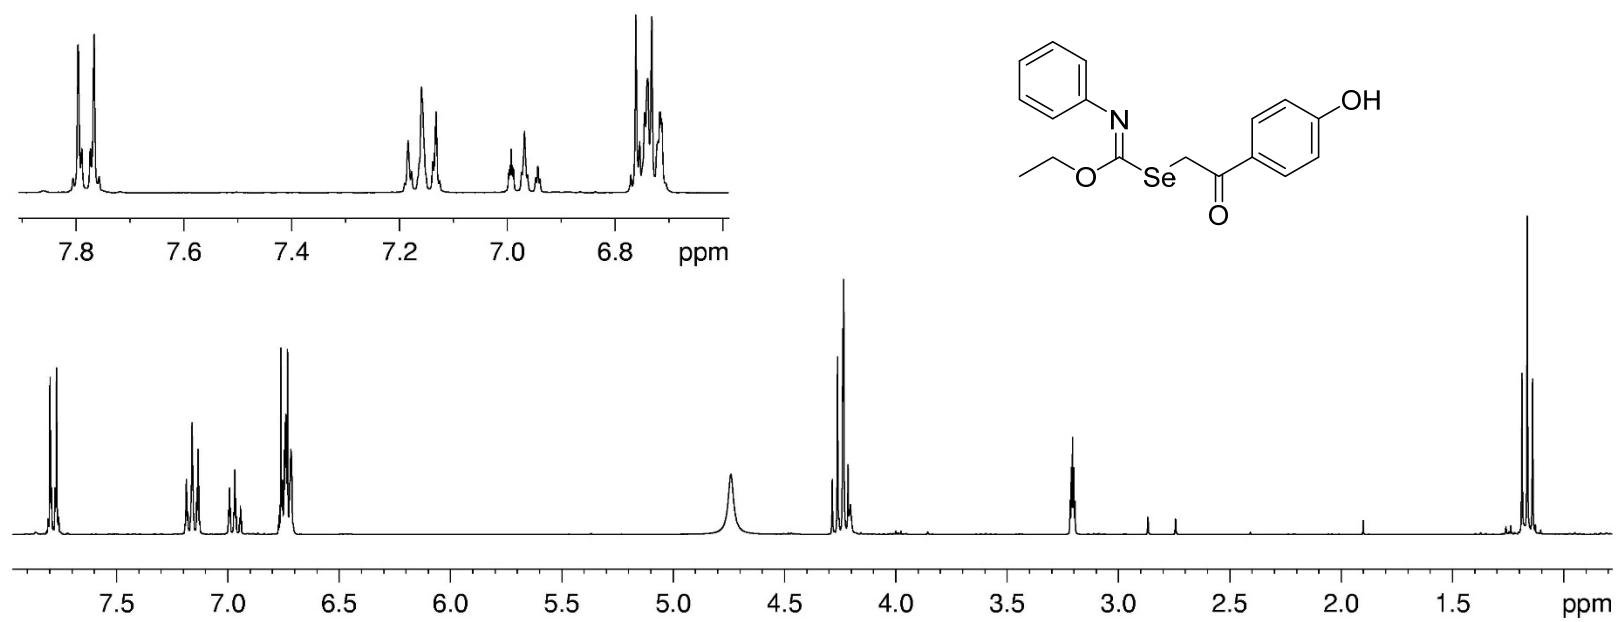

$^1\text{H}$ -NMR (300 MHz,  $\text{CD}_3\text{OD}$ ) of **17**

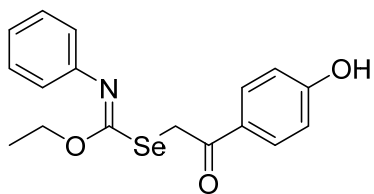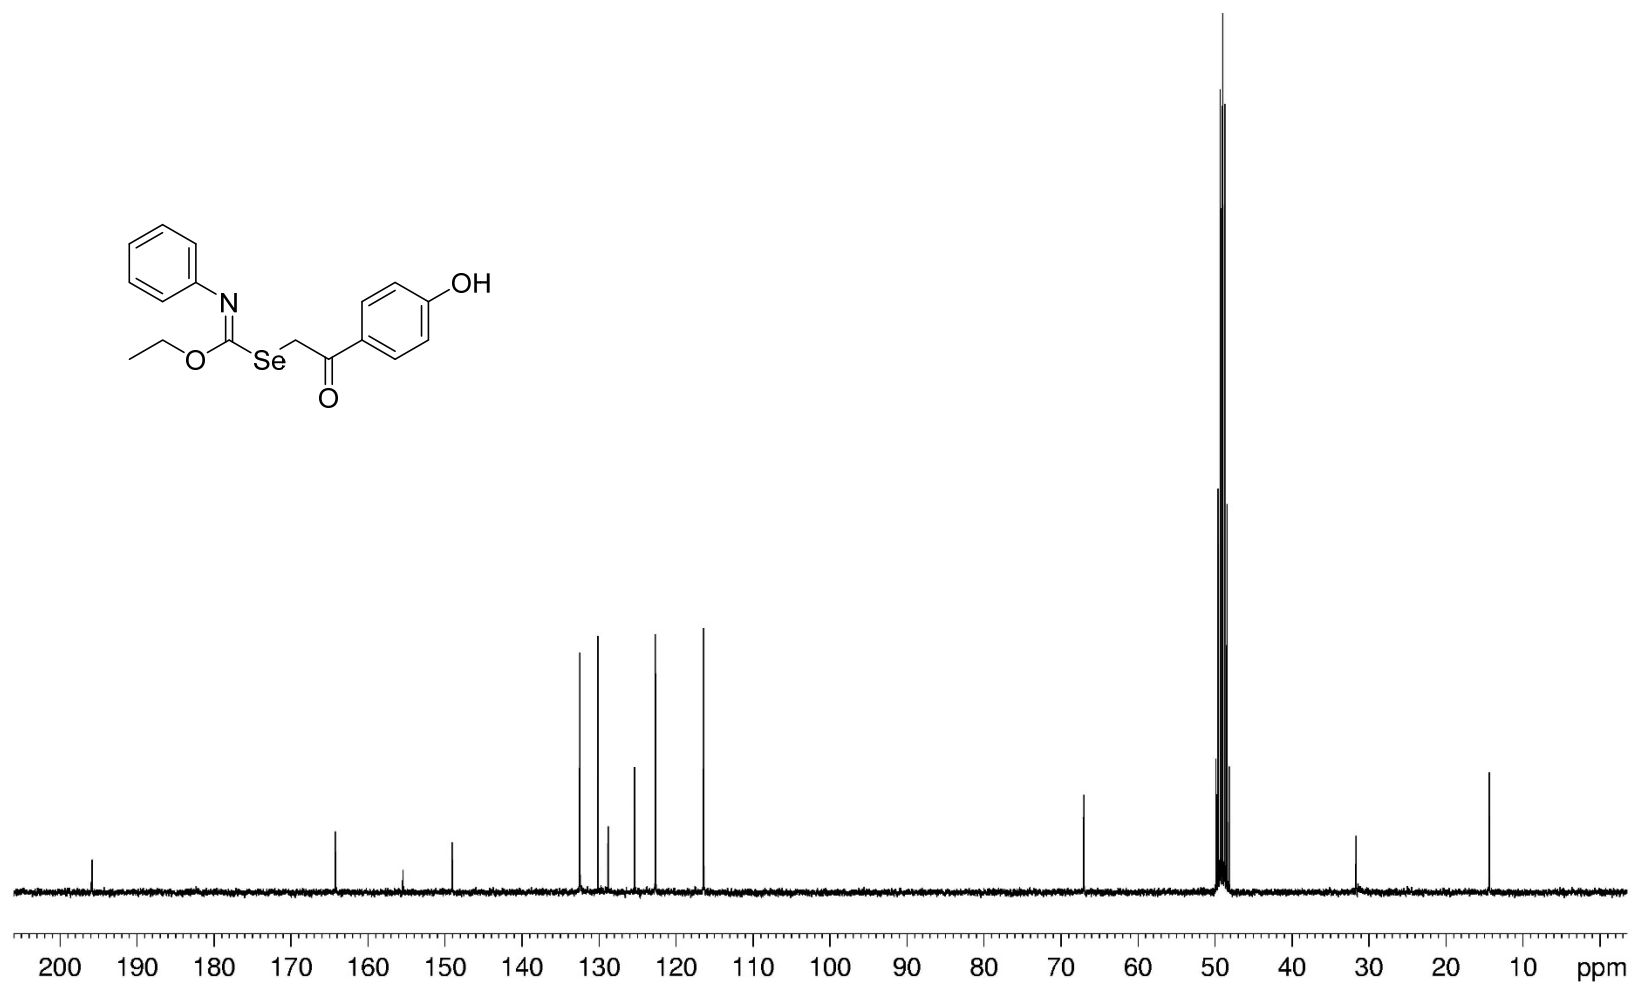

$^{13}\text{C}$ -NMR (125.7 MHz,  $\text{CD}_3\text{OD}$ ) of **17**

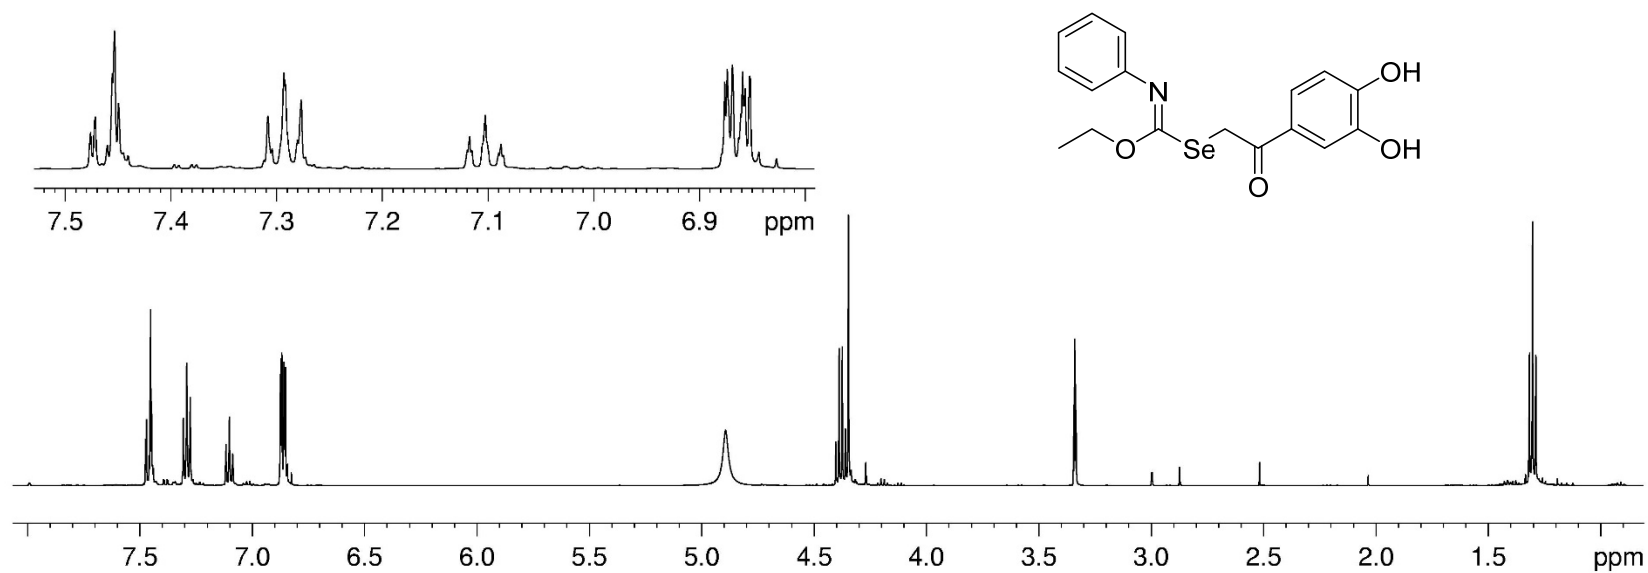

$^1\text{H}$ -NMR (500 MHz,  $\text{CD}_3\text{OD}$ ) of **18**

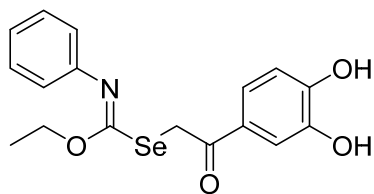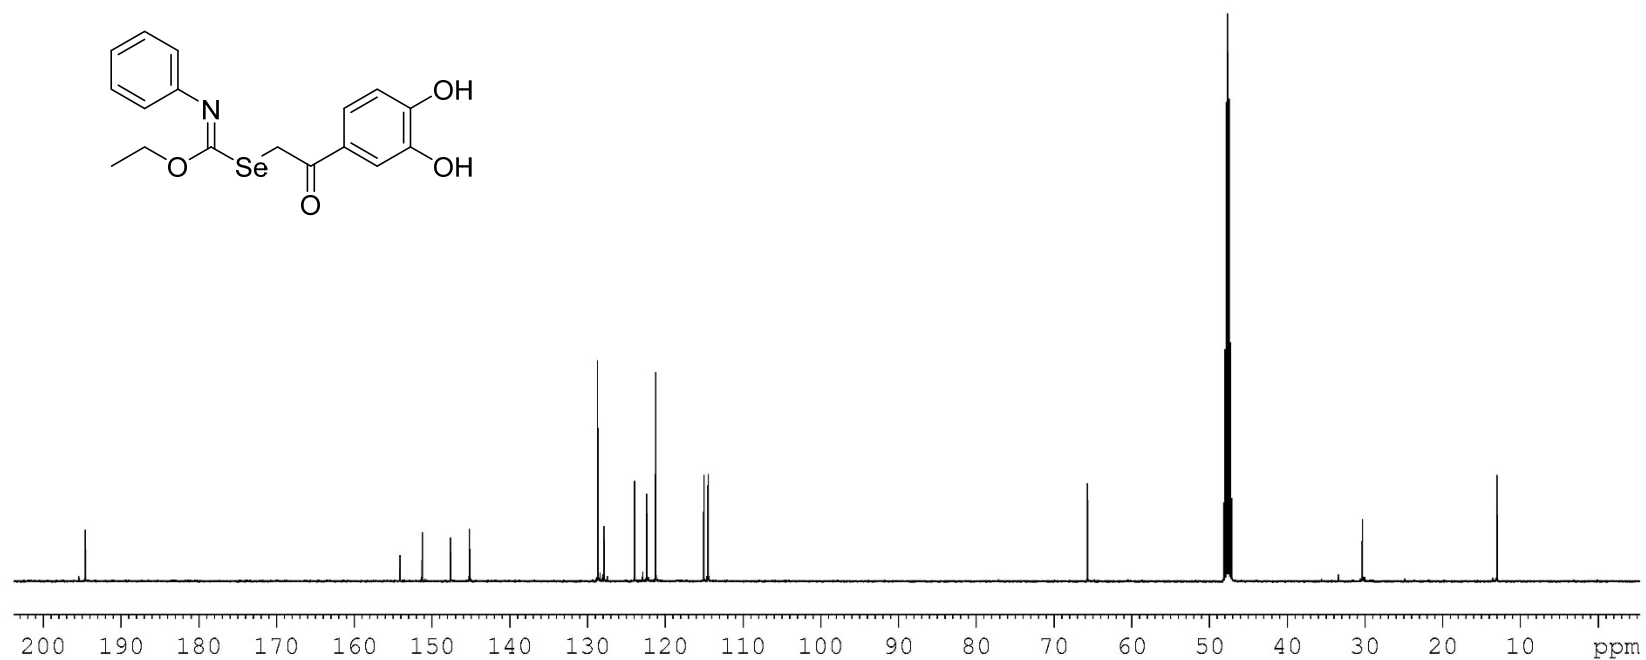

$^{13}\text{C}$ -NMR (125.7 MHz,  $\text{CD}_3\text{OD}$ ) of **18**

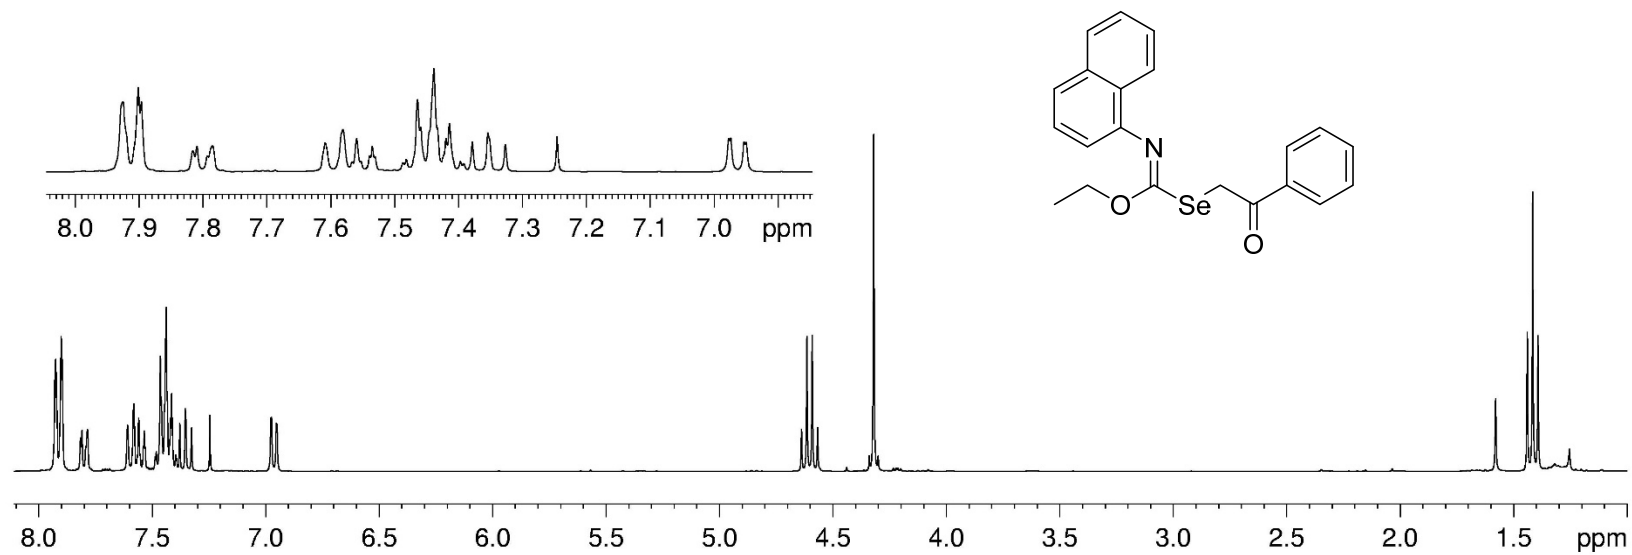

$^1\text{H}$ -NMR (300 MHz,  $\text{CDCl}_3$ ) of **19**





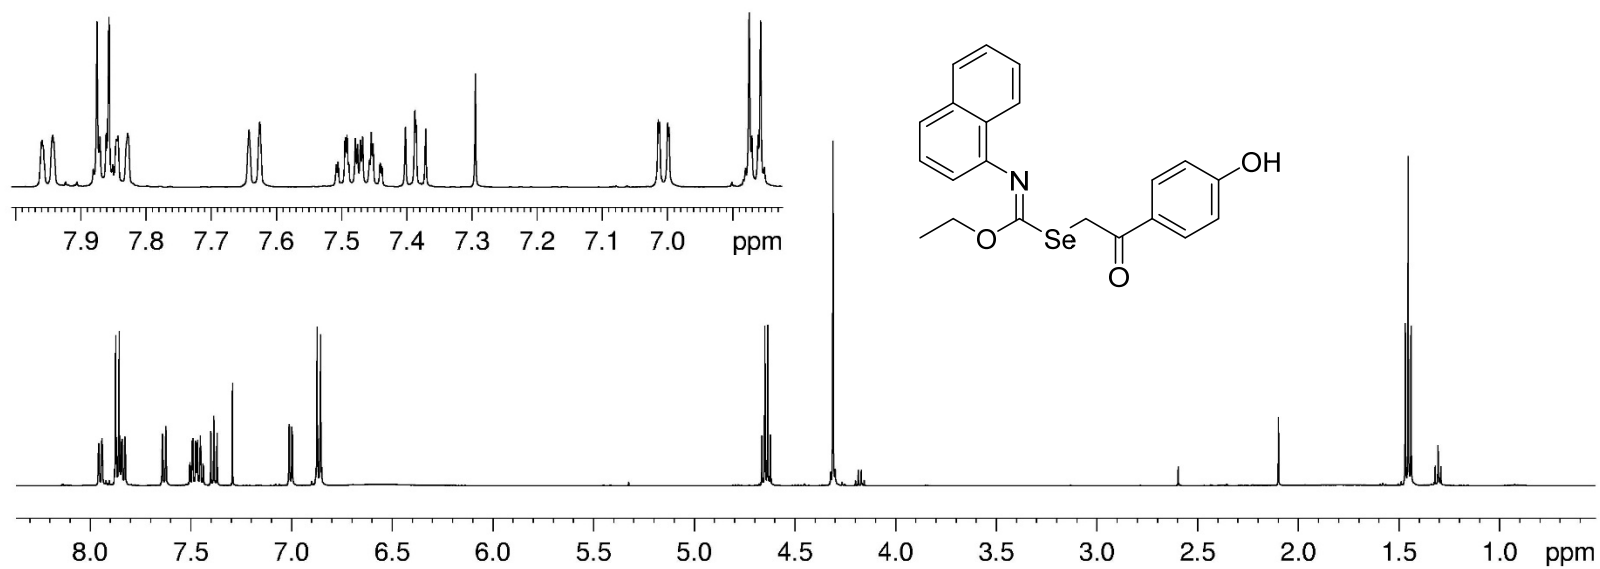

$^1\text{H}$ -NMR (500 MHz,  $\text{CDCl}_3$ ) of **20**

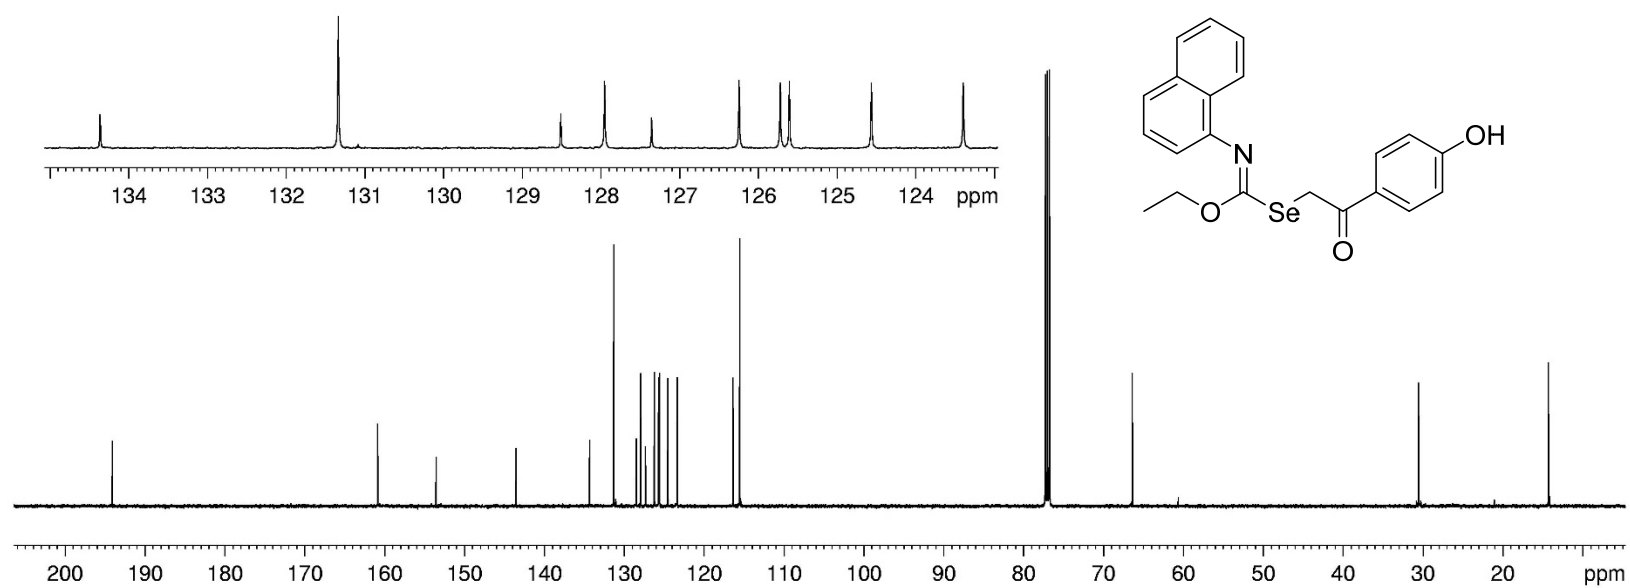

$^{13}\text{C}$ -NMR (125.7 MHz,  $\text{CDCl}_3$ ) of **20**

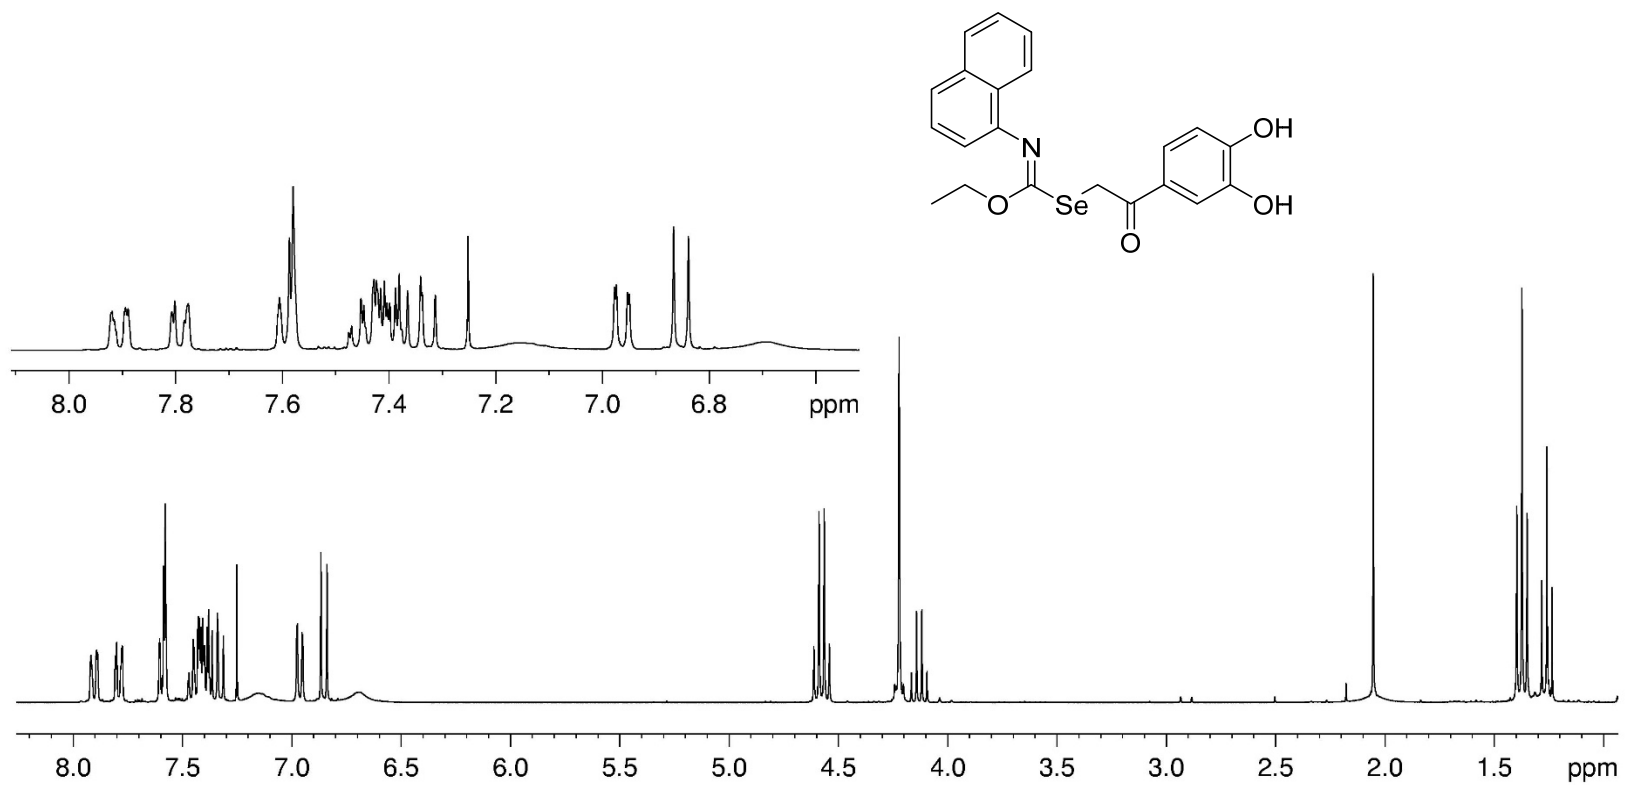

$^1\text{H}$ -NMR (300 MHz,  $\text{CDCl}_3$ ) of **21**

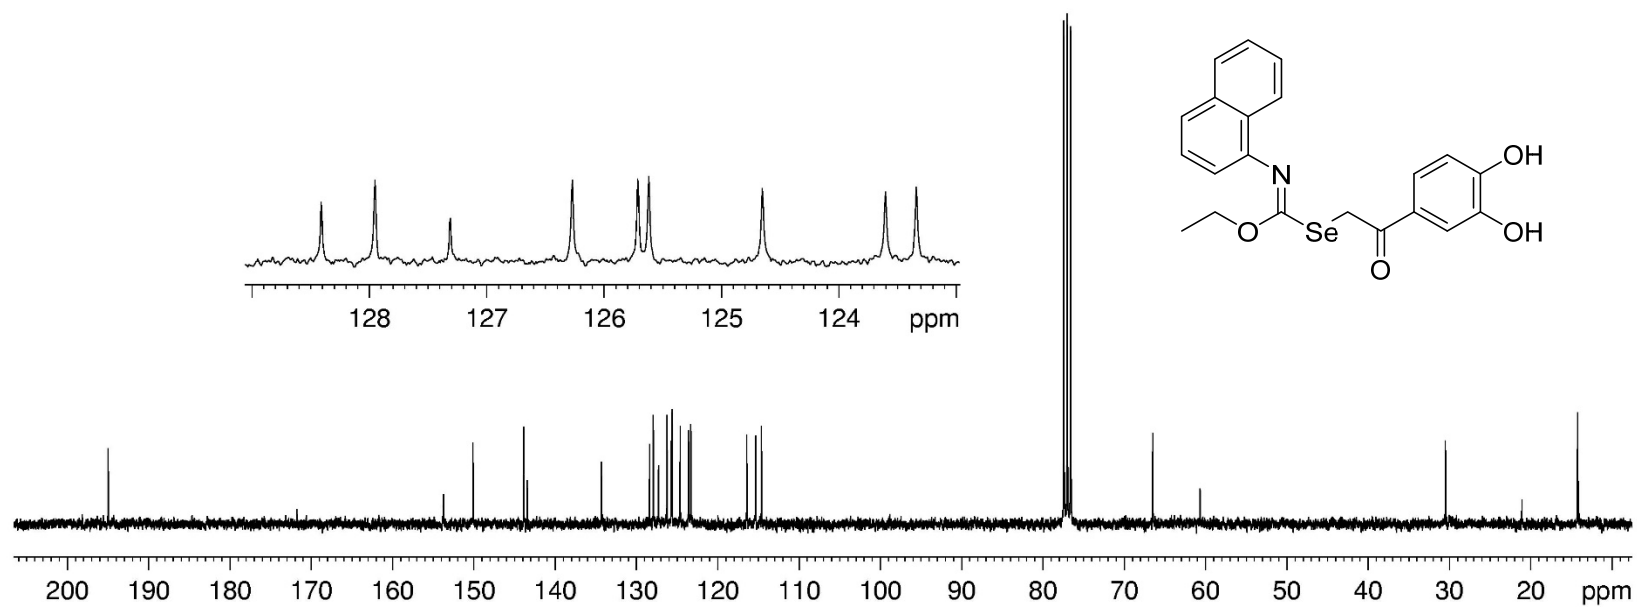

$^{13}\text{C}$ -NMR (75.5 MHz,  $\text{CDCl}_3$ ) of **21**

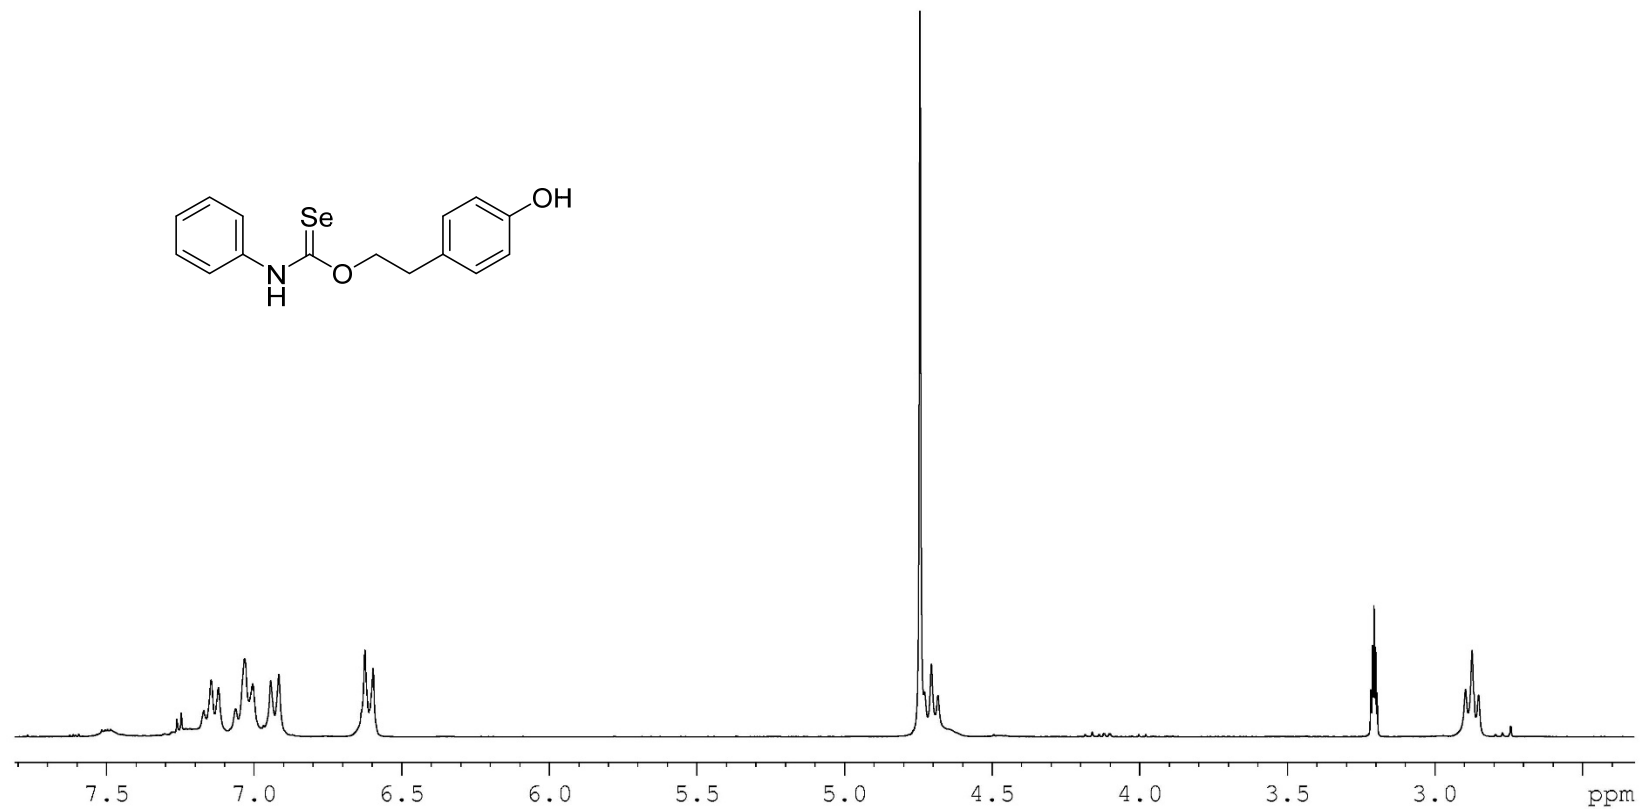

$^1\text{H}$ -NMR (300 MHz,  $\text{CD}_3\text{OD}$ ) of **24**

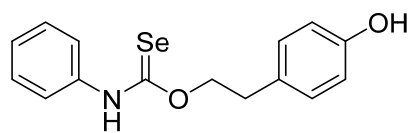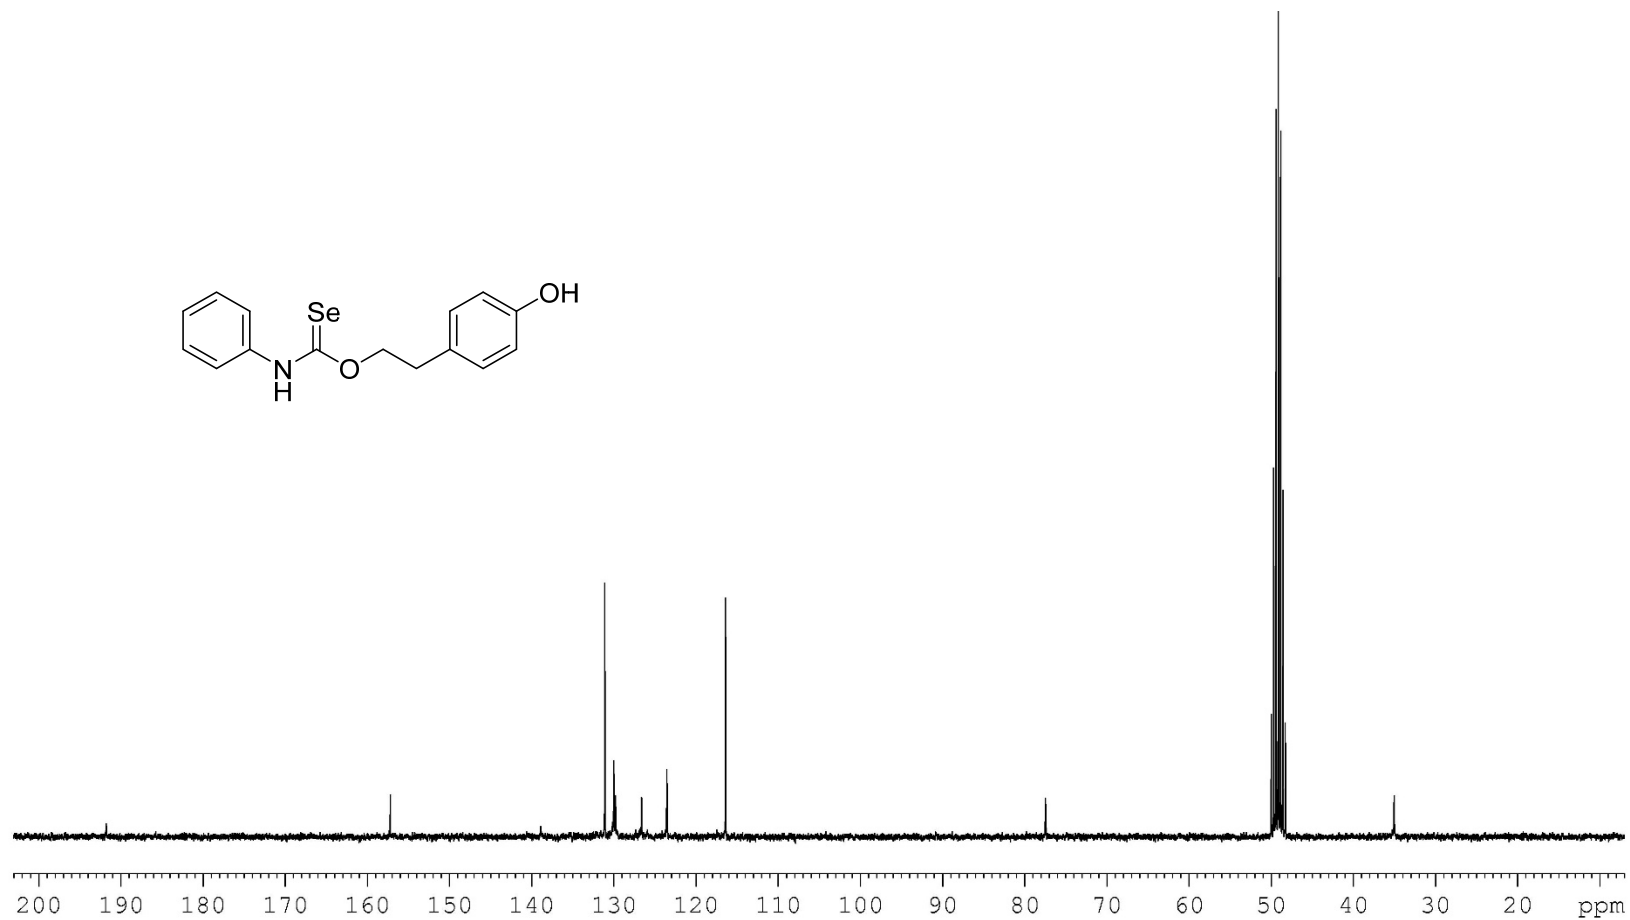

$^{13}\text{C}$ -NMR (75.5 MHz,  $\text{CD}_3\text{OD}$ ) of **24**

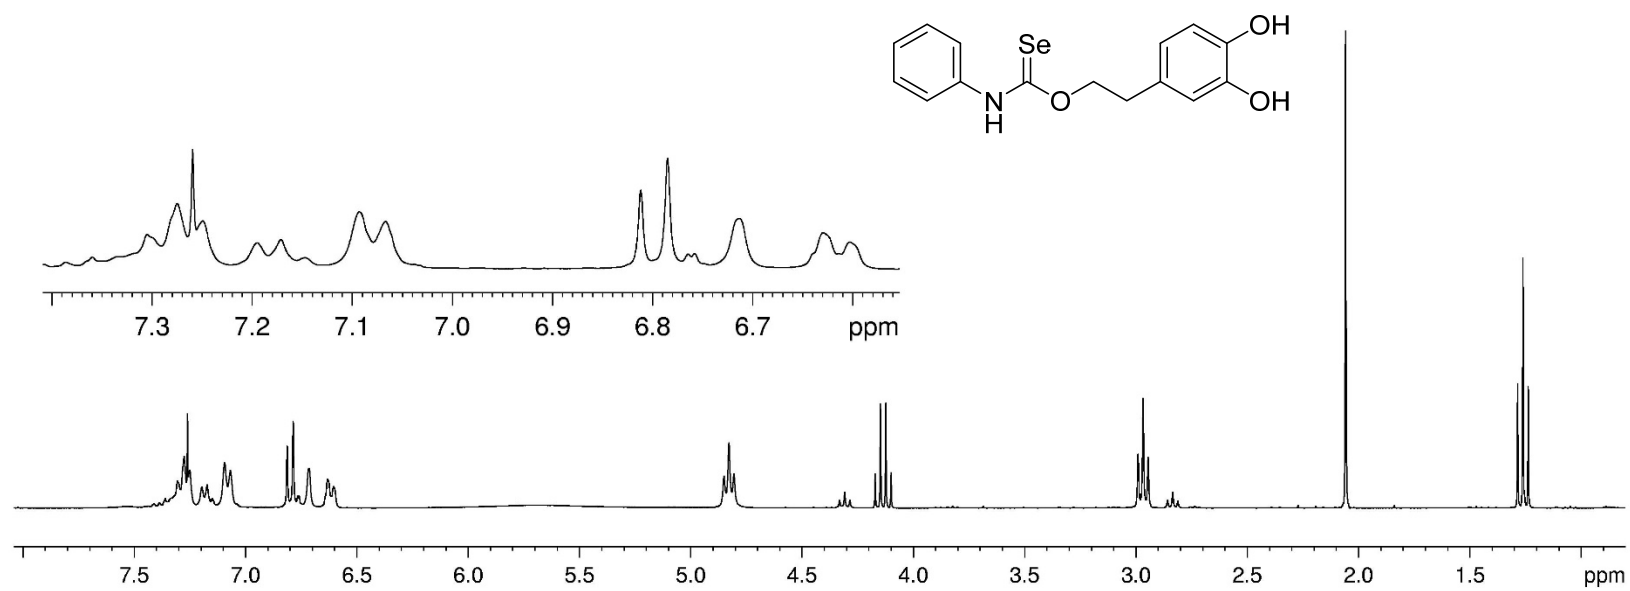

$^1\text{H}$ -NMR (300 MHz,  $\text{CDCl}_3$ ) of **25a**



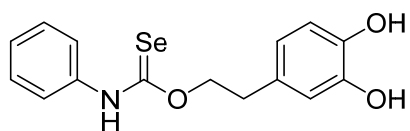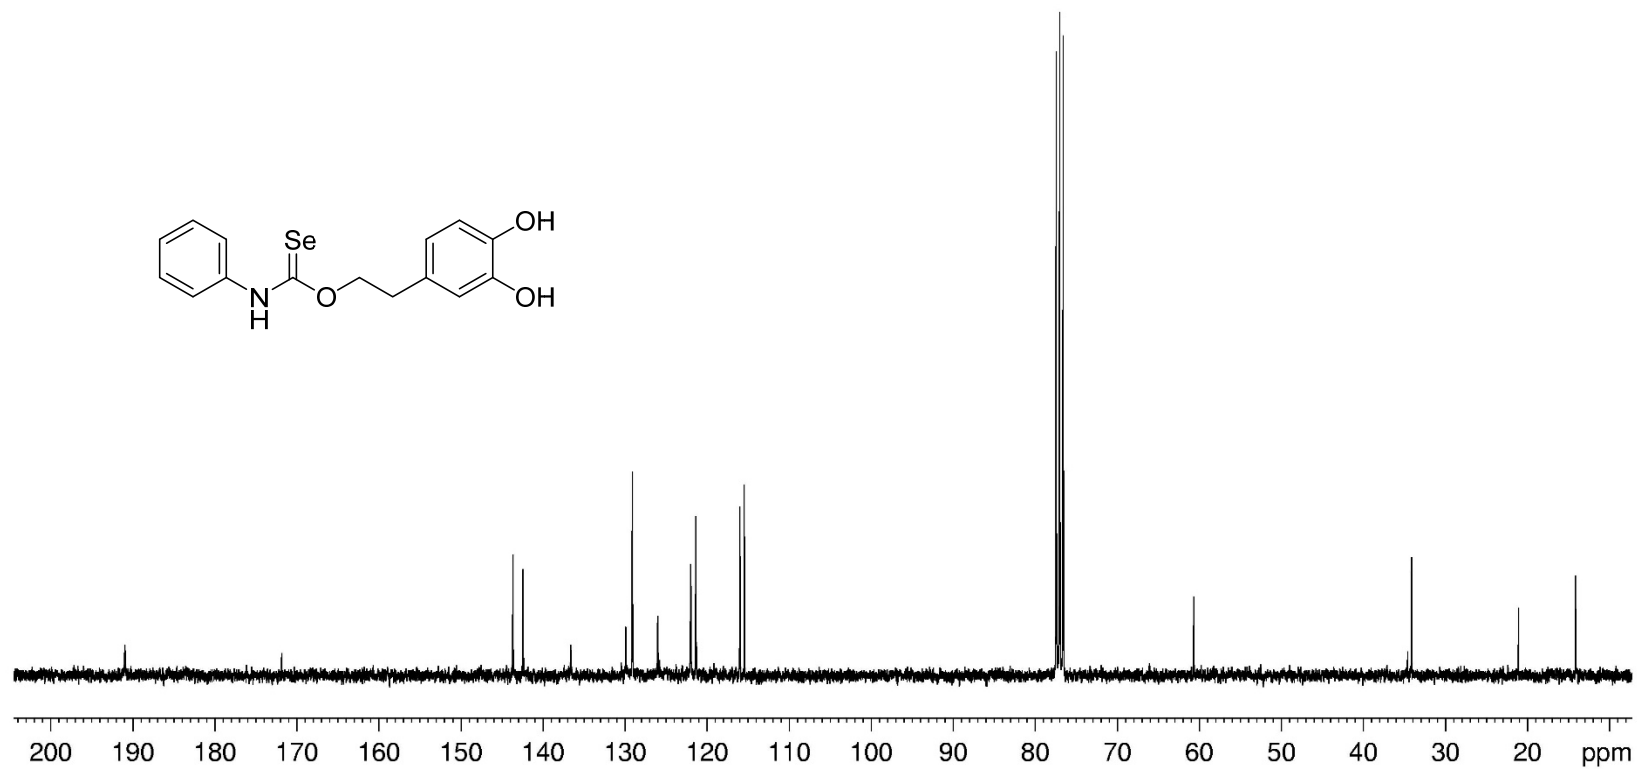

$^{13}\text{C}$ -NMR (75.5 MHz,  $\text{CDCl}_3$ ) of **25a**

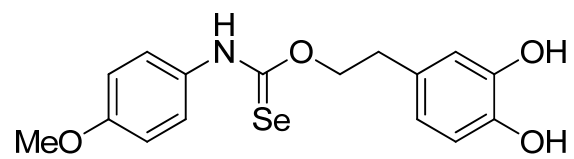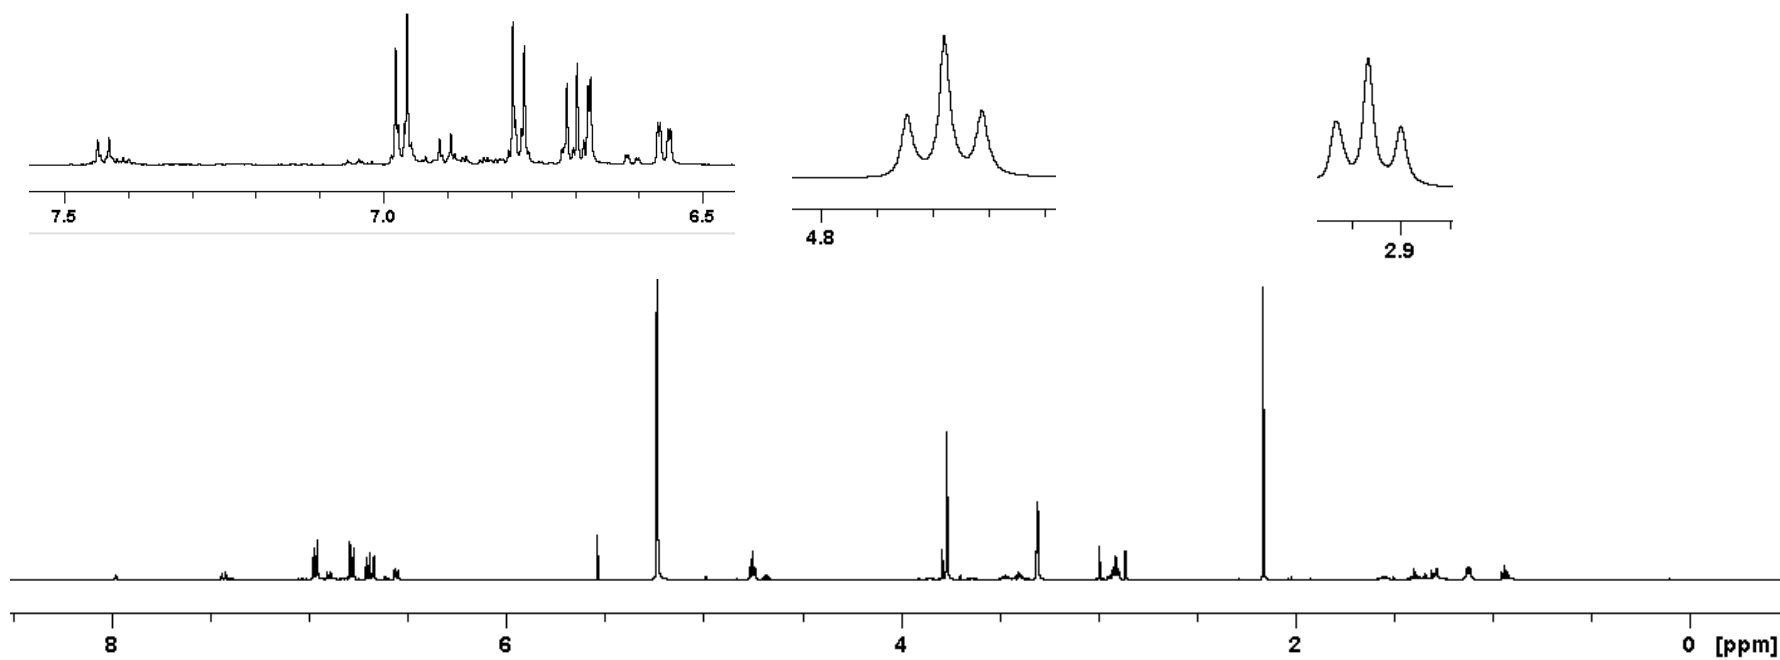

$^1\text{H}$ -NMR (500 MHz,  $-20^\circ\text{C}$ ,  $\text{CD}_3\text{OD}$ ) of **25b**

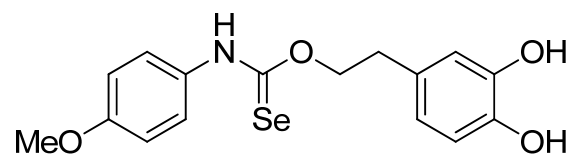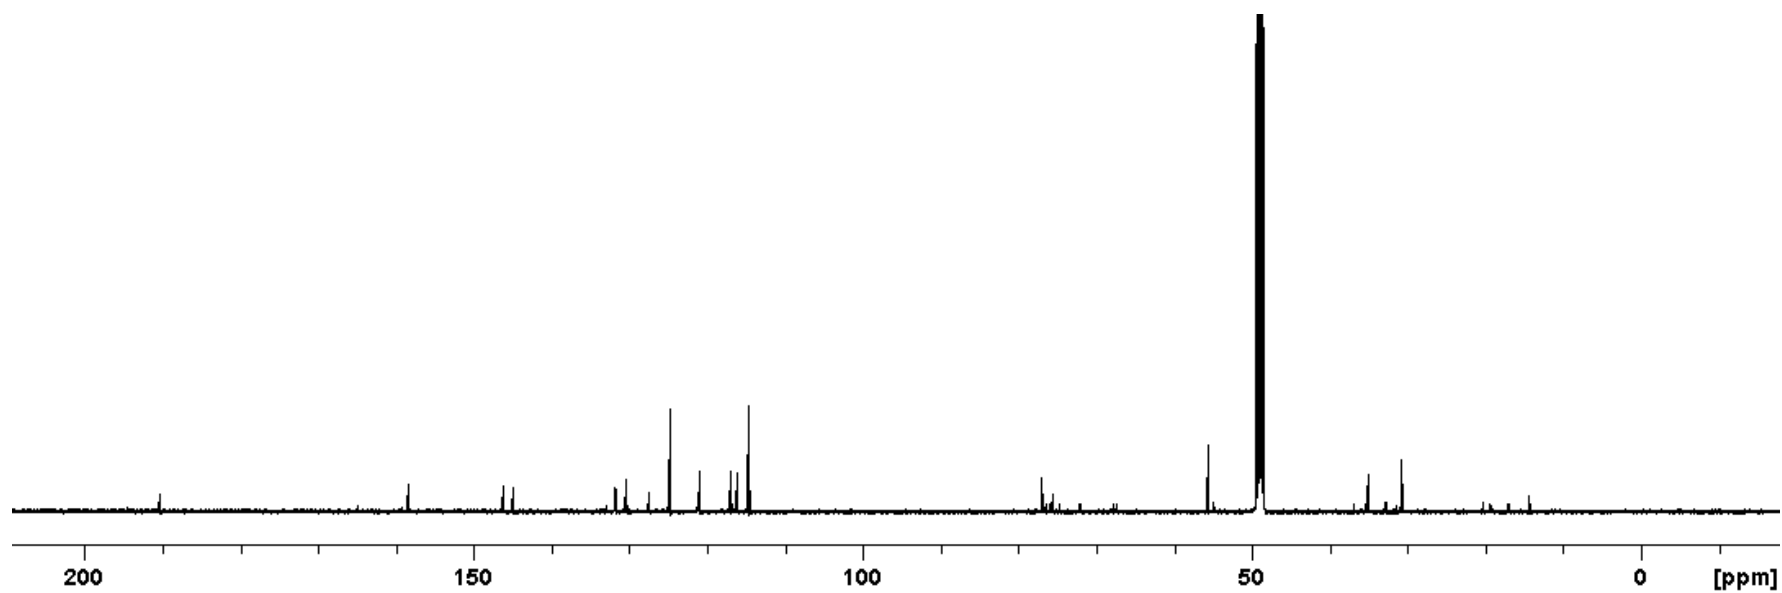

$^{13}\text{C}$ -NMR (125.7 MHz,  $-20\text{ }^\circ\text{C}$ ,  $\text{CD}_3\text{OD}$ ) of **25b**

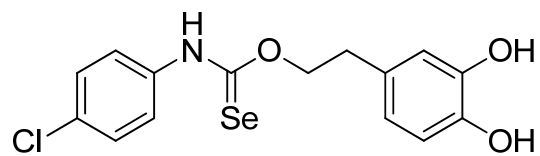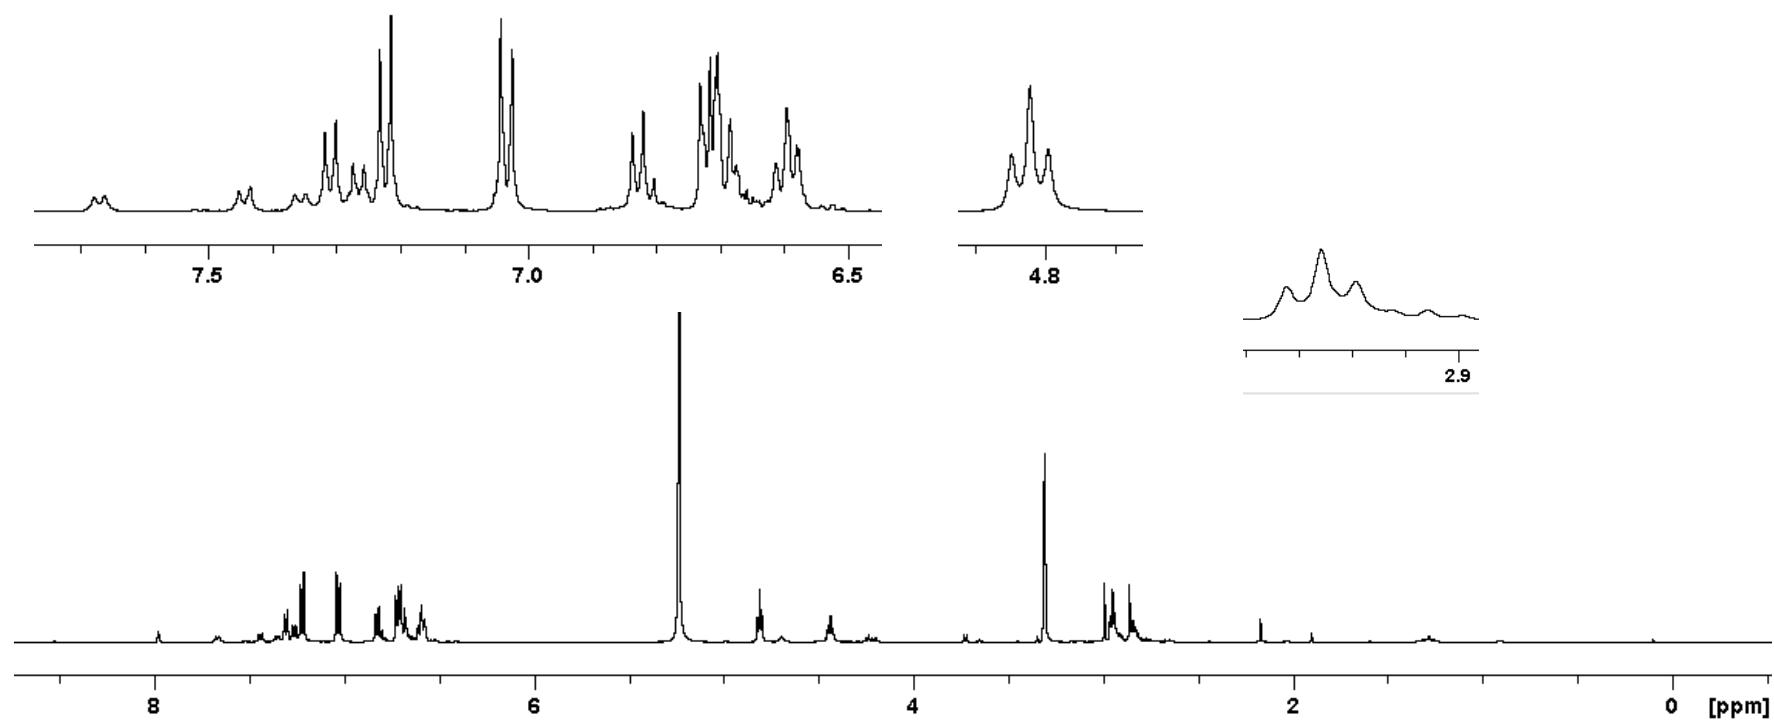

$^1\text{H}$ -NMR (500 MHz,  $-20^\circ\text{C}$ ,  $\text{CD}_3\text{OD}$ ) of **25c**

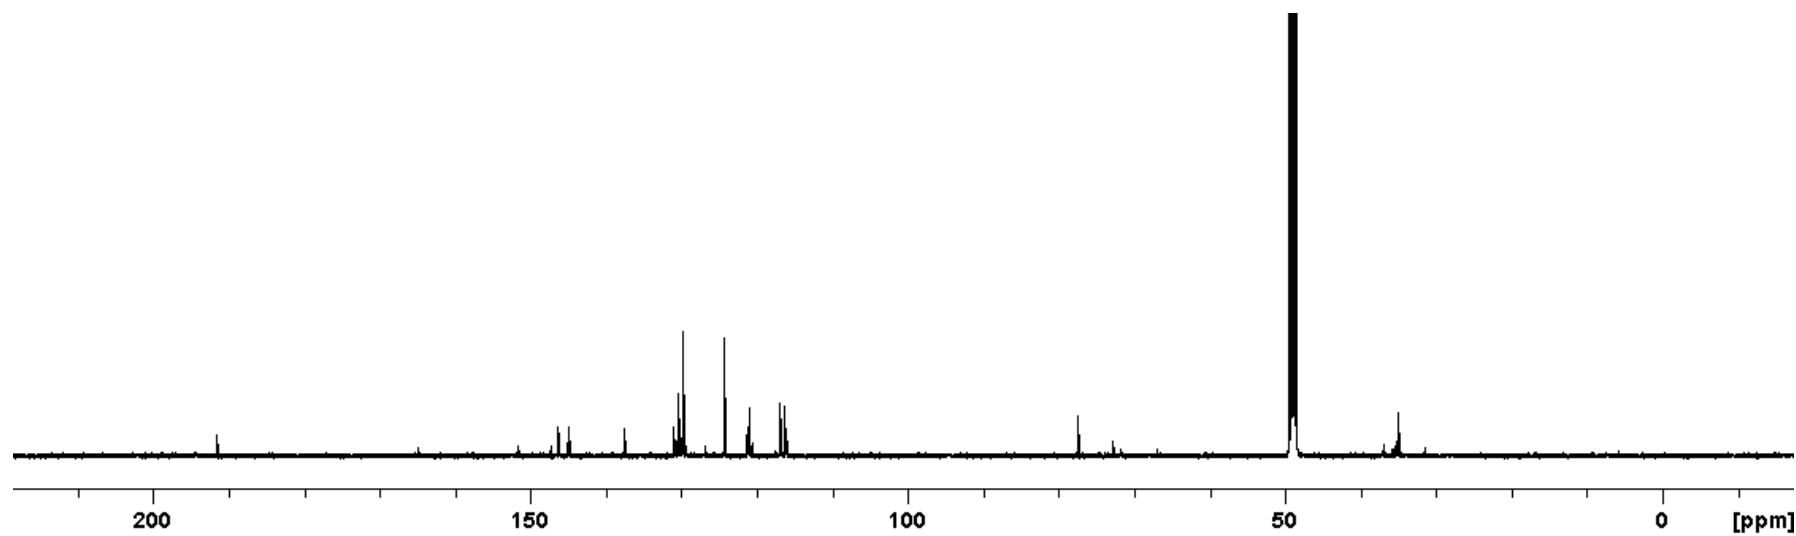

$^{13}\text{C}$ -NMR (125.7 MHz,  $-20\text{ }^{\circ}\text{C}$ ,  $\text{CD}_3\text{OD}$ ) of **25c**

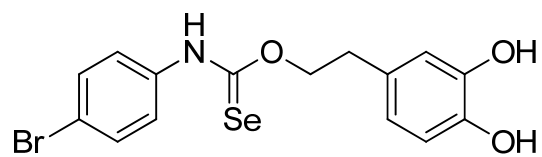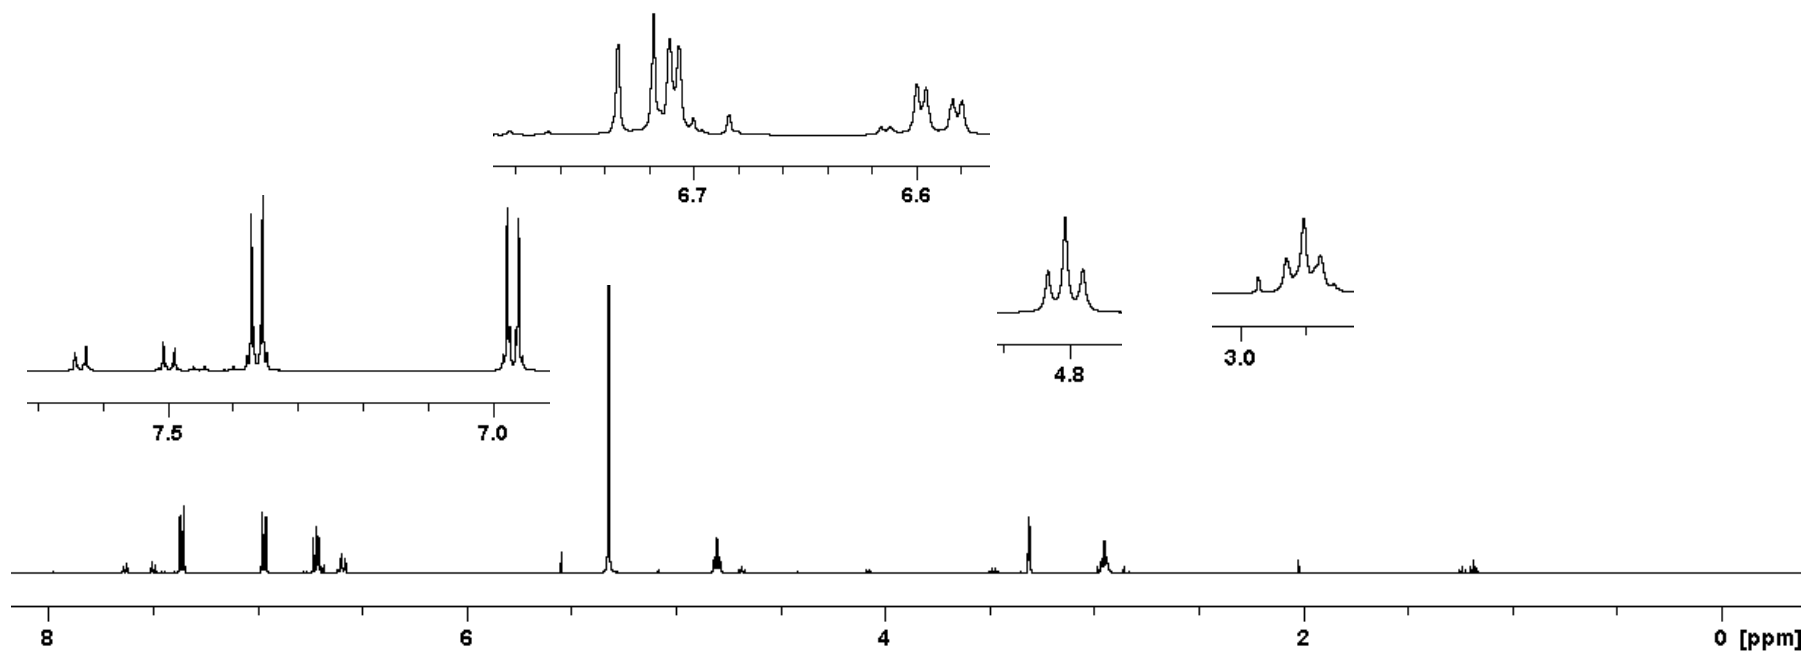

$^1\text{H}$ -NMR (500 MHz,  $-20\text{ }^\circ\text{C}$ ,  $\text{CD}_3\text{OD}$ ) of **25d**

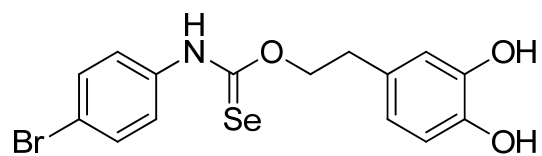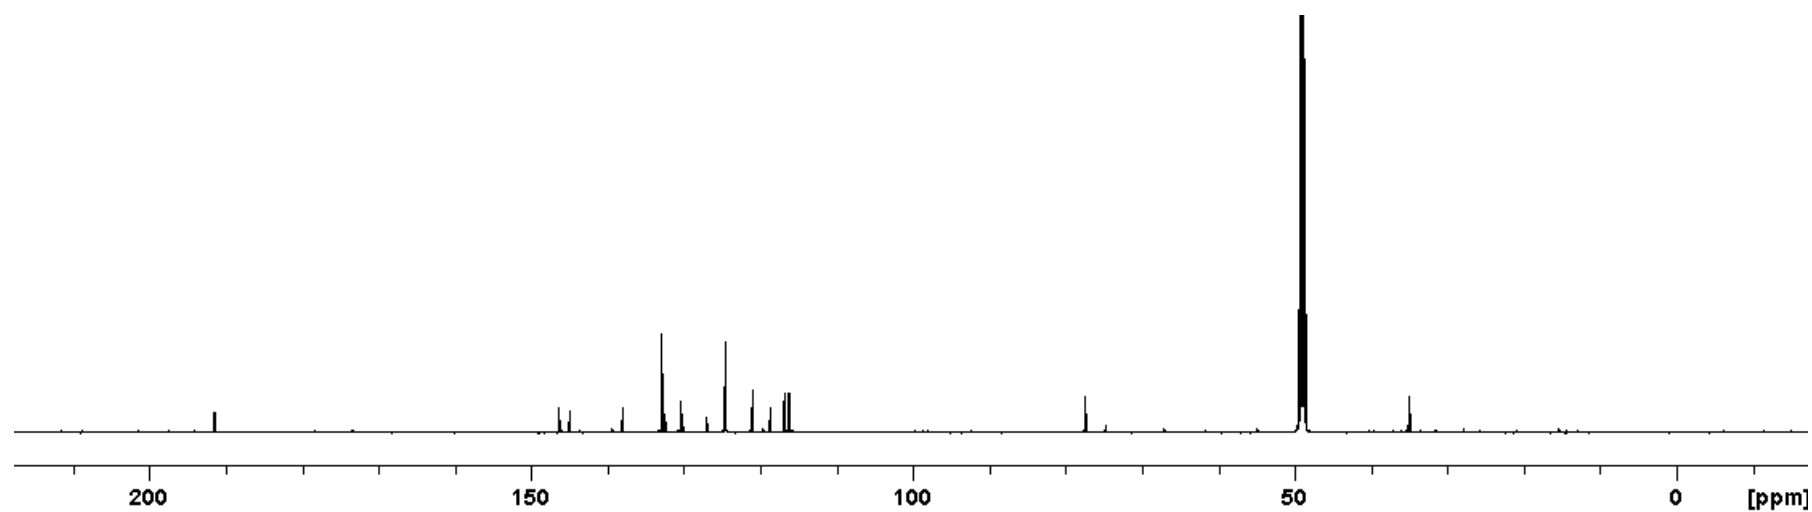

$^{13}\text{C}$ -NMR (125.7 MHz,  $-20\text{ }^\circ\text{C}$ ,  $\text{CD}_3\text{OD}$ ) of **25d**

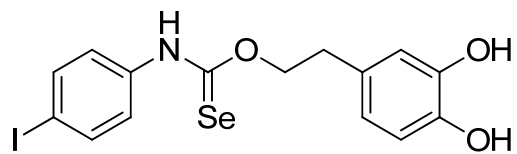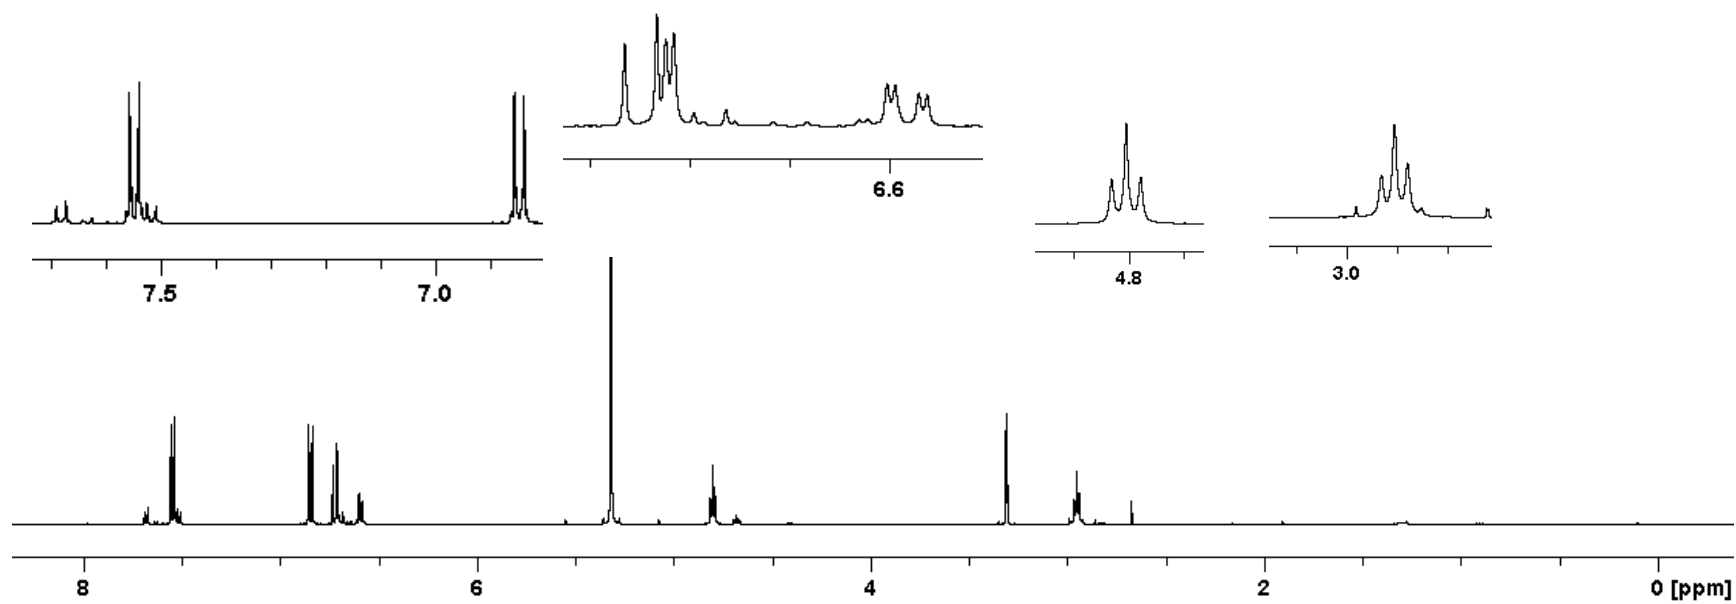

$^1\text{H}$ -NMR (500 MHz,  $-20\text{ }^\circ\text{C}$ ,  $\text{CD}_3\text{OD}$ ) of **25e**



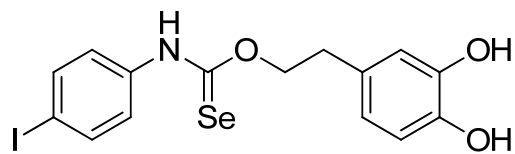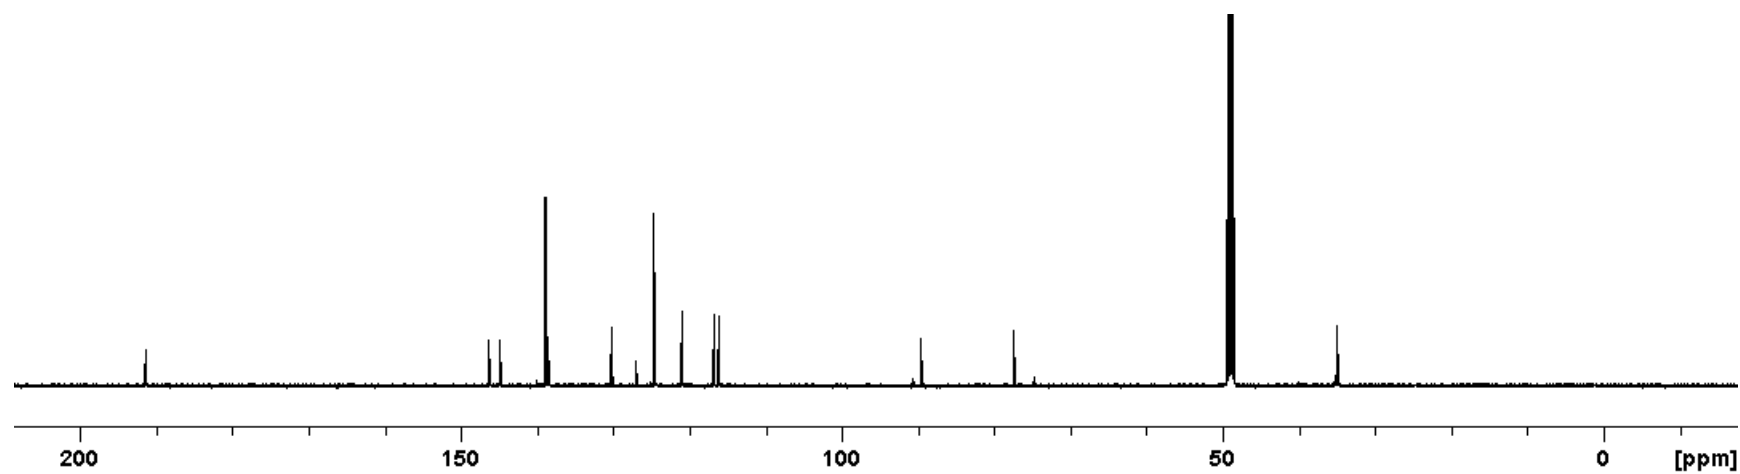

$^{13}\text{C}$ -NMR (125.7 MHz,  $-20\text{ }^{\circ}\text{C}$ ,  $\text{CD}_3\text{OD}$ ) of **25e**

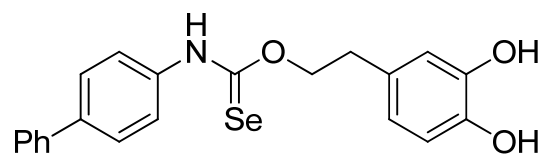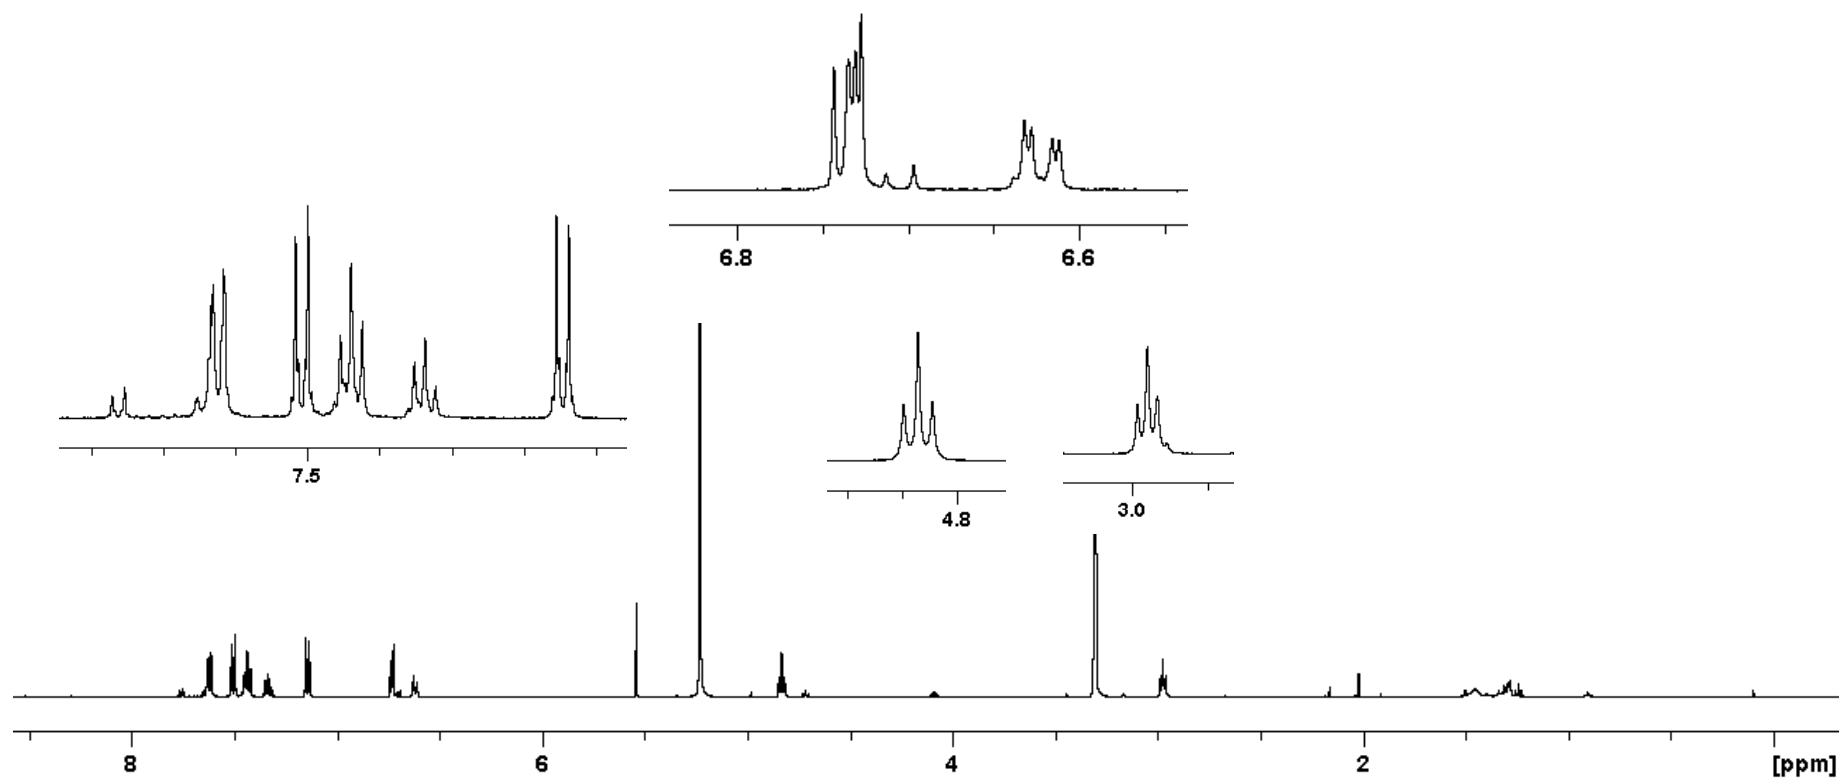

<sup>1</sup>H-NMR (500 MHz, -20 °C, CD<sub>3</sub>OD) of **25f**

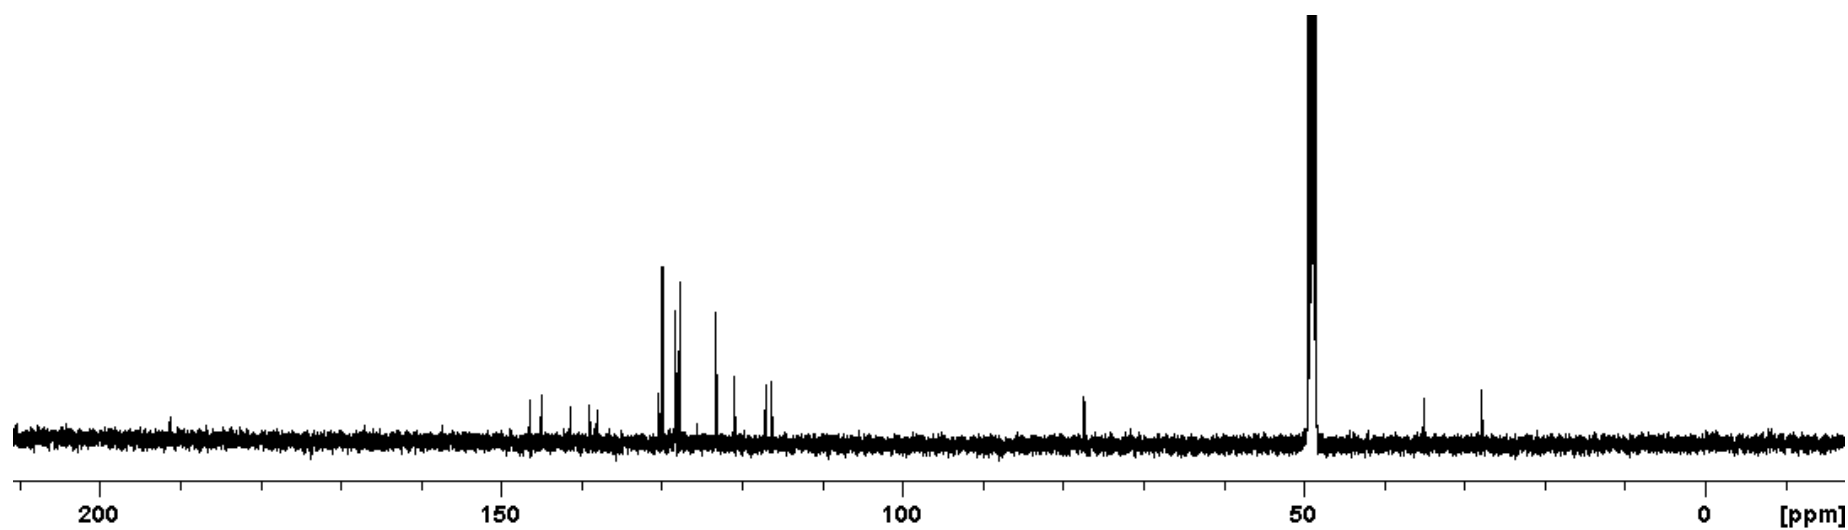

$^{13}\text{C}$ -NMR (125.7 MHz,  $-20\text{ }^\circ\text{C}$ ,  $\text{CD}_3\text{OD}$ ) of **25f**

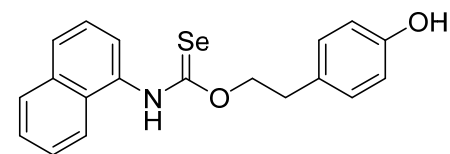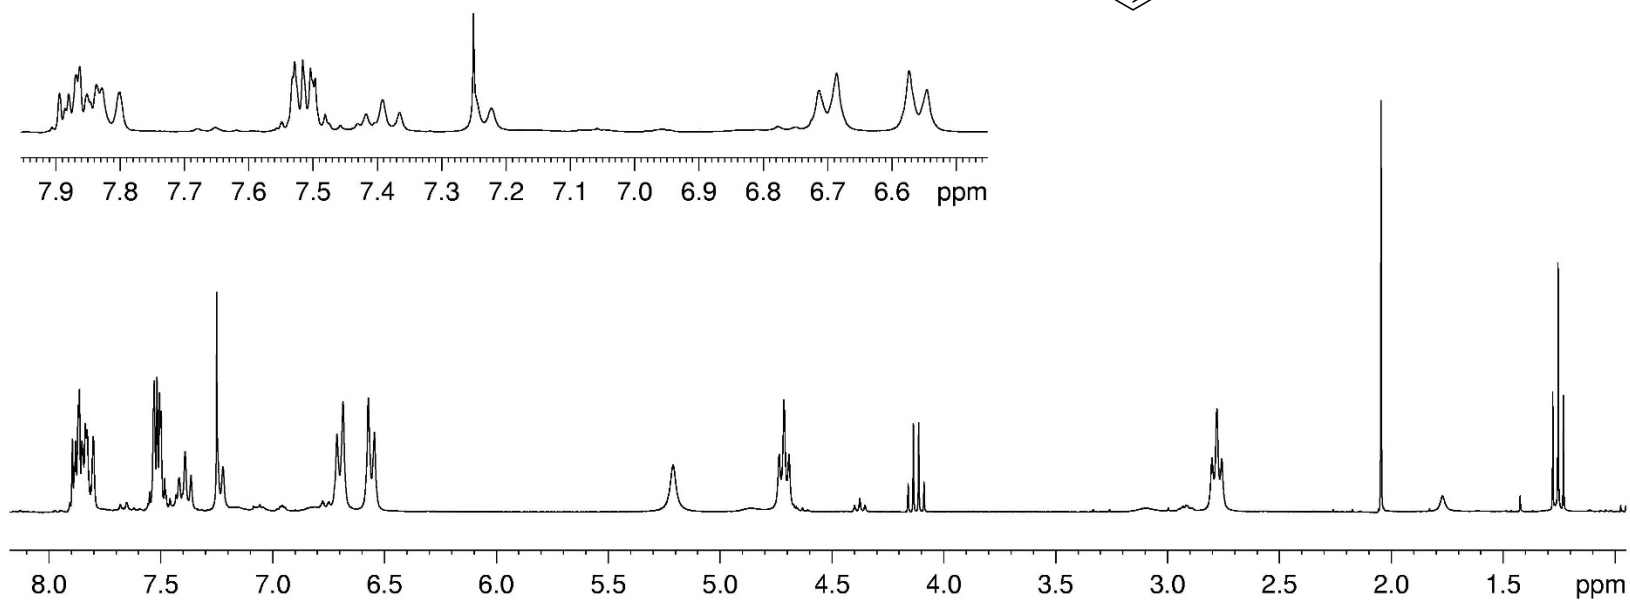

$^1\text{H}$ -NMR (300 MHz,  $\text{CDCl}_3$ ) of **26**

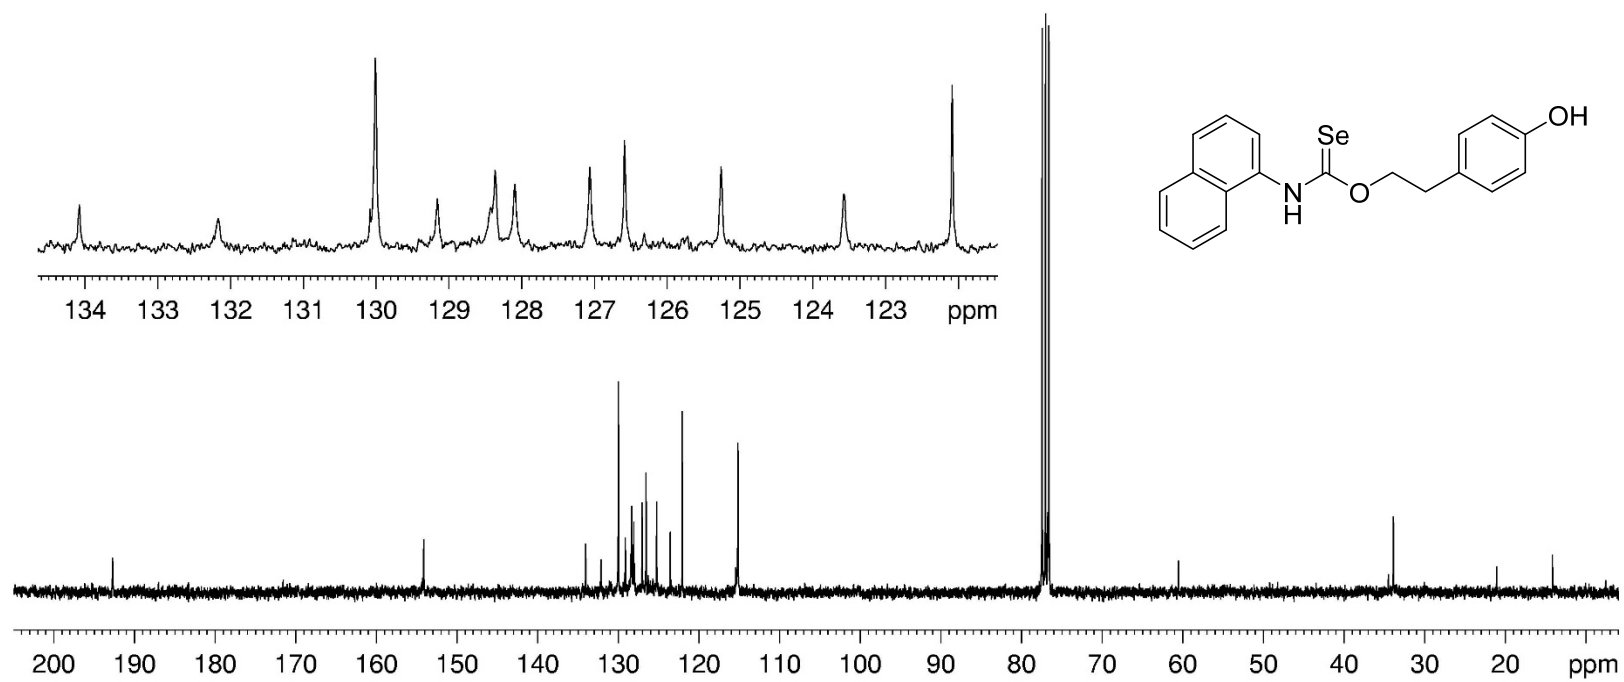

$^{13}\text{C}$ -NMR (75.5 MHz,  $\text{CDCl}_3$ ) of **26**

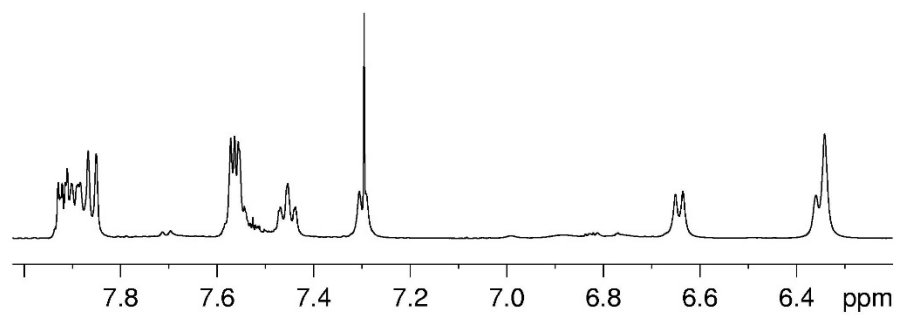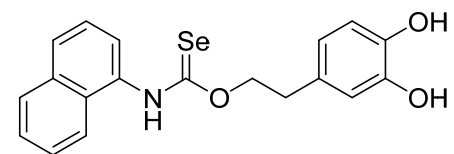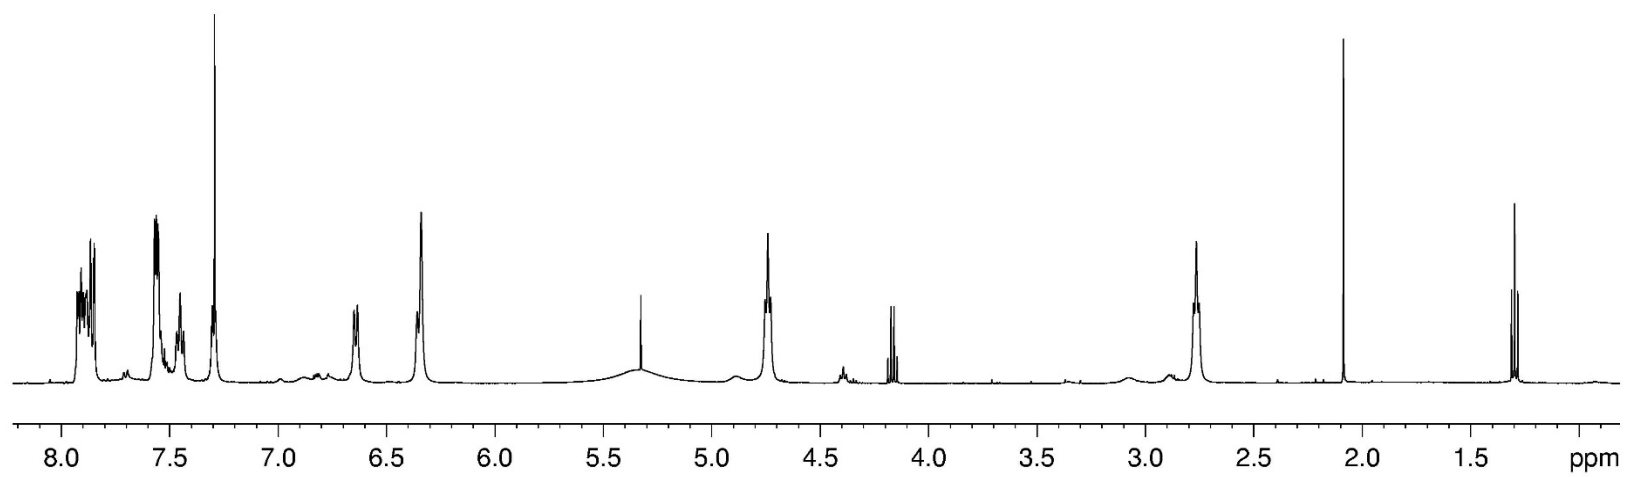

<sup>1</sup>H-NMR (500 MHz, CDCl<sub>3</sub>) of **27**

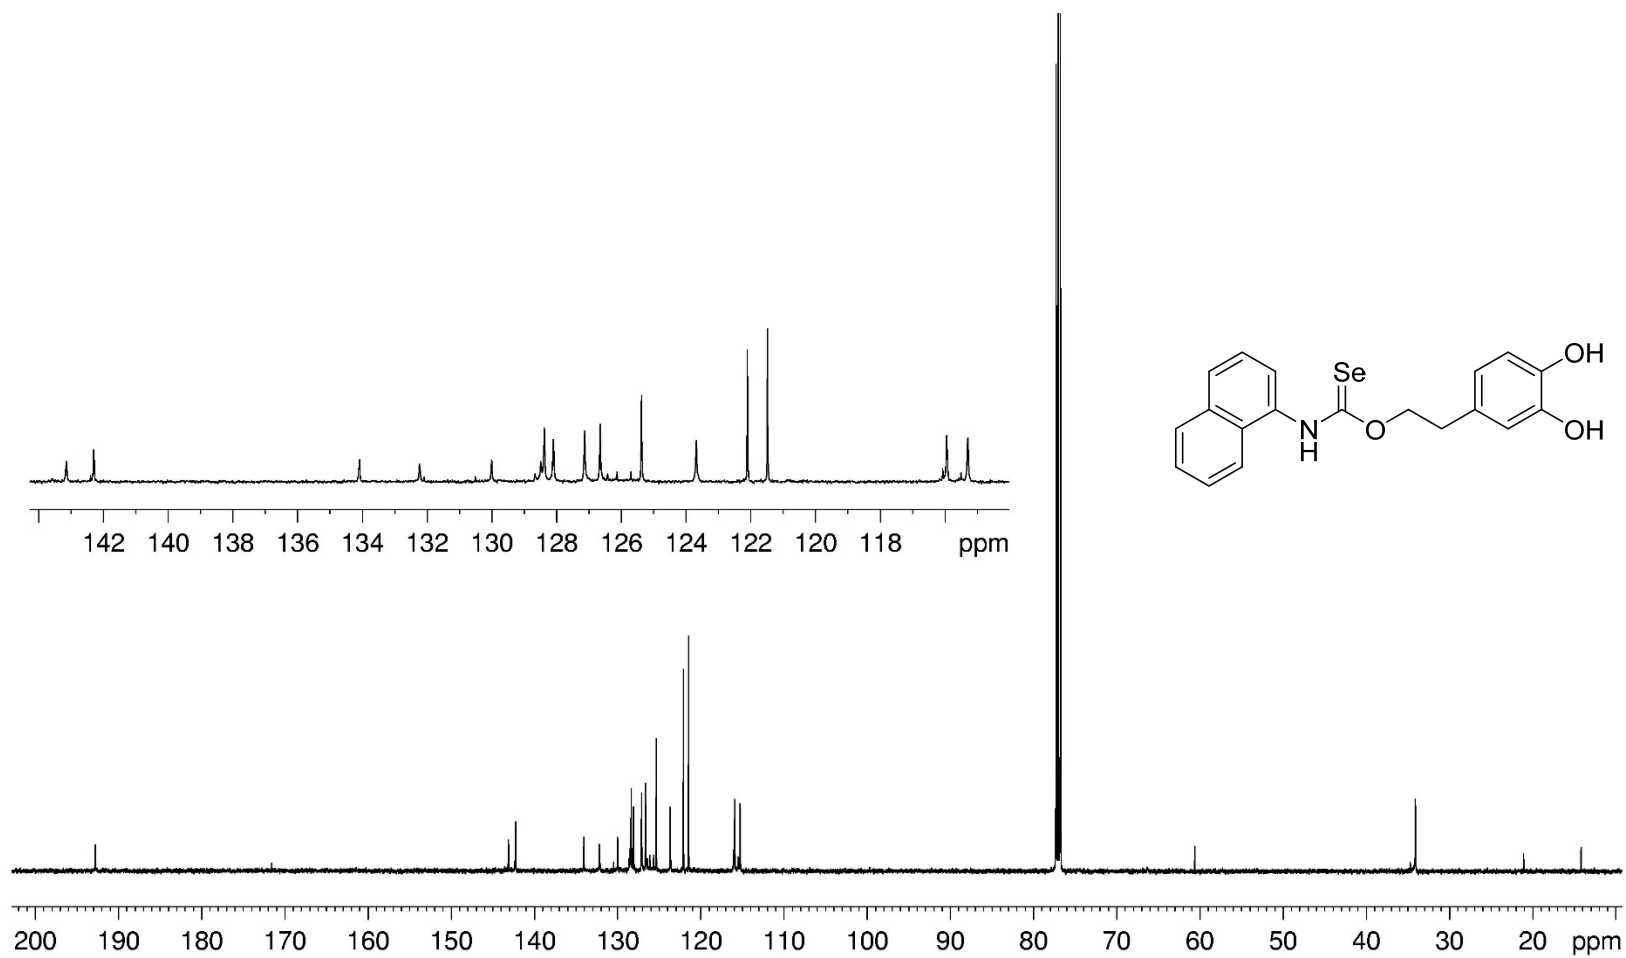

$^{13}\text{C}$ -NMR (125.7 MHz,  $\text{CDCl}_3$ ) of **27**
